# Supplementary material
Source: Research Square preprint supplement (doi:10.21203/rs.3.rs-9924259/v1)
Supplement: Supplementary file 1 [file 6a61f40d6d02152063cc7d00.xlsx]

## Sheet: Supplementary Table 3 - Apatite
Supplementary Table 3. Textural positions of apatite grains, NanoSIMS data for both S and Cl abundances and isotopes (including new Cl data for apatites of five mare basalts (12031, 15085, 15475, 15545 and 15556)). δ34S is relative to V-CDT and δ37Cl is relative to SMOC. All results are reported at the 2σ uncertainty level (which includes internal and external measurement uncertainties).
References	Year	Sample	Sample-Spec	Mission	G-Lithology	Lithology	Sample-Type	Grain-Size	Texture	Mineral	Crystal-Orientation	Analysis-ID	Textural-Position-Ap	Apatite Shape	Apatite Size	δ34S	2σ-δ34S	S-(ppm)	2σ-ppm-S	δ37Cl	2σ-δ37Cl	Cl-(ppm)	2σ-ppm-Cl	H2O content	Troilite-ID	Textural-Position-Tro	Troilite-δ34S	Tro-2σ-δ34S	Tro-S-(ppm)	Tro-2σ-ppm-S	δ34S-Bulk-Gargano-(2022)	2σ-δ34S-Bulk	δ34S-Bulk-Gibson-(1975)	2σ-δ34S-Bulk	[S]ppm-Bulk	SiO2-Bulk	FeO-Bulk	MgO-Bulk	Al2O3-Bulk	CaO-Bulk	K2O-Bulk	2O-Bulk	TiO2-Bulk	SiO2-Mesostasis	MgO-Mesostasis	FeO-Mesostasis	Al2O3-Mesostasis	CaO-Mesostasis	K2O-Mesostasis
This-Study		10044	10044-645	Apollo-11	Basalt	Hi-Ti-Basalt	Hi-Ti-Basalt	Coarse-Grained	Poprhyritic	Apatite	∥-to-c-axis	Ap1_001	Mesostasis					bdl		9.3	1.3	471	33	na	na	na	na	na	na	na	0.81	na	na	na	na	42.2	17.9	6	10.4	12.1	0.03	0.5	10.2	70	0.3	10.8	9.3	6.4	0.5
This-Study		10044	10044-645	Apollo-11	Basalt	Hi-Ti-Basalt	Hi-Ti-Basalt	Coarse-Grained	Poprhyritic	Apatite	∥-to-c-axis	Ap5	Mesostasis					bdl		6.3	1.4	464	32	na	na	na	na	na	na	na	0.81	na	na	na	na	42.2	17.9	6	10.4	12.1	0.03	0.5	10.2	70	0.3	10.8	9.3	6.4	0.5
This-Study		10044	10044-645	Apollo-11	Basalt	Hi-Ti-Basalt	Hi-Ti-Basalt	Coarse-Grained	Poprhyritic	Apatite	∥-to-c-axis	Ap6	Mesostasis					bdl		10.4	1.4	470	33	na	na	na	na	na	na	na	0.81	na	na	na	na	42.2	17.9	6	10.4	12.1	0.03	0.5	10.2	70	0.3	10.8	9.3	6.4	0.5
												Ap8_1_001								11.7	1.1	1188	83
This-Study		12031	12031-17	Apollo-12	Basalt	Low-Ti-Basalt	Pigeonite-Basalts	Coarse-Grained	Porphyritic	Apatite	∥-to-c-axis	Ap001a	Mesostasis	subhedral ~25 μm	Enclosed by ~80 μm FeS	2	2.8	193	15	16.5	2.5	2521	112	na	na	na	na	na	na	na	na	na	na	na	na	47	16.8	7.1	12.6	12.3	0.05	0.33	2.9	na	na	na	na	na	na
This-Study		12031	12031-17	Apollo-12	Basalt	Low-Ti-Basalt	Pigeonite-Basalts	Coarse-Grained	Porphyritic	Apatite	∥-to-c-axis	Ap001b	Mesostasis	anhedral ~100 μm	Adjacent ~85 μm FeS	0.2	3.4	151	12	16.5	2.6	2775	123	na	na	na	na	na	na	na	na	na	na	na	na	47	16.8	7.1	12.6	12.3	0.05	0.33	2.9	na	na	na	na	na	na
This-Study		12031	12031-17	Apollo-12	Basalt	Low-Ti-Basalt	Pigeonite-Basalts	Coarse-Grained	Porphyritic	Apatite	∥-to-c-axis	Ap002_002	Mesostasis	anhedral ~30 μm	In proximity	0.6	3.1	255	20	17.1	2.5	3490	155	na	na	na	na	na	na	na	na	na	na	na	na	47	16.8	7.1	12.6	12.3	0.05	0.33	2.9	na	na	na	na	na	na
This-Study		12031	12031-17	Apollo-12	Basalt	Low-Ti-Basalt	Pigeonite-Basalts	Coarse-Grained	Porphyritic	Apatite	∥-to-c-axis	Ap003	Mesostasis	anhedral ~40 μm	-	2.2	6.3	28	2	16.9	2.7	551	25	na	na	na	na	na	na	na	na	na	na	na	na	47	16.8	7.1	12.6	12.3	0.05	0.33	2.9	na	na	na	na	na	na
This-Study		12031	12031-17	Apollo-12	Basalt	Low-Ti-Basalt	Pigeonite-Basalts	Coarse-Grained	Porphyritic	Apatite	∥-to-c-axis	Ap004	Enclosed-in-Px	subhedral ~30 μm	-	0.7	5.1	35	3	10.4	1.3	578	26	na	na	na	na	na	na	na	na	na	na	na	na	47	16.8	7.1	12.6	12.3	0.05	0.33	2.9	na	na	na	na	na	na
This-Study		12031	12031-17	Apollo-12	Basalt	Low-Ti-Basalt	Pigeonite-Basalts	Coarse-Grained	Porphyritic	Apatite	∥-to-c-axis	Ap005	Mesostasis	anhedral ~40 μm	-	5.3	5.2	34	3	9.6	1.4	402	18	na	na	na	na	na	na	na	na	na	na	na	na	47	16.8	7.1	12.6	12.3	0.05	0.33	2.9	na	na	na	na	na	na
This-Study		12039	12039-45	Apollo-12	Basalt	Low-Ti-Basalt	Pigeonite-Basalts	Coarse-Grained	Ophitic	Apatite	∥-to-c-axis	Ap001_a	Mesostasis	Adjacent ~25 μm FeS	Adjacent ~25 μm FeS	9	9.2	47	5	12.5	2	1280	49	na	na	na	na	na	na	na	na	na	na	na	na	46.1	20.3	5.8	10.5	11.7	0.1	0.3	4.5	na	na	na	na	na	na
This-Study		12039	12039-45	Apollo-12	Basalt	Low-Ti-Basalt	Pigeonite-Basalts	Coarse-Grained	Ophitic	Apatite	∥-to-c-axis	Ap001_c	Enclosed-in-Px	In proximity	In proximity	8	10.5	33	3	14.8	1.4	879	33	na	na	na	na	na	na	na	na	na	na	na	na	46.1	20.3	5.8	10.5	11.7	0.1	0.3	4.5	na	na	na	na	na	na
This-Study		12039	12039-45	Apollo-12	Basalt	Low-Ti-Basalt	Pigeonite-Basalts	Coarse-Grained	Ophitic	Apatite	∥-to-c-axis	Ap001_b	Mesostasis	In proximity	In proximity	1.2	13.6	19	2	17	2.9	667	25	na	na	na	na	na	na	na	na	na	na	na	na	46.1	20.3	5.8	10.5	11.7	0.1	0.3	4.5	na	na	na	na	na	na
This-Study		12039	12039-45	Apollo-12	Basalt	Low-Ti-Basalt	Pigeonite-Basalts	Coarse-Grained	Ophitic	Apatite	∥-to-c-axis	Ap001_d	Mesostasis	In proximity	In proximity	4.2	13.7	36	4	17.6	2.7	464	18	na	na	na	0.422222	na	na	na	na	na	na	na	na	46.1	20.3	5.8	10.5	11.7	0.1	0.3	4.5	na	na	na	na	na	na
This-Study		12039	12039-45	Apollo-12	Basalt	Low-Ti-Basalt	Pigeonite-Basalts	Coarse-Grained	Ophitic	Apatite	∥-to-c-axis	Ap001_f	Mesostasis	In proximity	In proximity	-2.1	7	112	12	18.5	1	2988	113	na	na	na		na	na	na	na	na	na	na	na	46.1	20.3	5.8	10.5	11.7	0.1	0.3	4.5	na	na	na	na	na	na
This-Study		12039	12039-45	Apollo-12	Basalt	Low-Ti-Basalt	Pigeonite-Basalts	Coarse-Grained	Ophitic	na	na	na	na	na	na	na	na	na	na	na	na	na	na		Tr004_1	matrix	0.7	0.8	na	na	na	na	na	na	na	46.1	20.3	5.8	10.5	11.7	0.1	0.3	4.5	na	na	na	na	na	na
This-Study		12039	12039-45	Apollo-12	Basalt	Low-Ti-Basalt	Pigeonite-Basalts	Coarse-Grained	Ophitic	na	na	na	na	na	na	na	na	na	na	na	na	na	na		Tr004_2	matrix	-0.5	0.8	na	na	na	na	na	na	na	46.1	20.3	5.8	10.5	11.7	0.1	0.3	4.5	na	na	na	na	na	na
This-Study		12039	12039-45	Apollo-12	Basalt	Low-Ti-Basalt	Pigeonite-Basalts	Coarse-Grained	Ophitic	na	na	na	na	na	na	na	na	na	na	na	na	na	na		Tr004_3	matrix	0.4	0.8	na	na	na	na	na	na	na	46.1	20.3	5.8	10.5	11.7	0.1	0.3	4.5	na	na	na	na	na	na
This-Study		12039	12039-45	Apollo-12	Basalt	Low-Ti-Basalt	Pigeonite-Basalts	Coarse-Grained	Ophitic	na	na	na	na	na	na	na	na	na	na	na	na	na	na		Tr004_4	matrix	1	0.8	na	na	na	na	na	na	na	46.1	20.3	5.8	10.5	11.7	0.1	0.3	4.5	na	na	na	na	na	na
This-Study		12039	12039-45	Apollo-12	Basalt	Low-Ti-Basalt	Pigeonite-Basalts	Coarse-Grained	Ophitic	na	na	na	na	na	na	na	na	na	na	na	na	na	na		Tr003	matrix	1	0.8	na	na	na	na	na	na	na	46.1	20.3	5.8	10.5	11.7	0.1	0.3	4.5	na	na	na	na	na	na
This-Study		14053	14053-19	Apollo-14	Basalt	Low-Ti- Hi-Al Basalt	Hi-Al-Basalt	Coarse-Grained	Ophitic	Apatite	∥-to-c-axis	Ap010	Mesostasis	subhedral ~40 μm	-	0.6	4.6	162	17	18.1	1.9	3071	348	na	na	na	na	na	na	na	0.6	na	na	na	na	46.3	16.8	8.72	13.6	11.2	0.12	na	2.6	na	na	na	na	na	na
This-Study		14053	14053-19	Apollo-14	Basalt	Low-Ti- Hi-Al Basalt	Hi-Al-Basalt	Coarse-Grained	Ophitic	Apatite	∥-to-c-axis	Ap005	Mesostasis	anhedral ~25 μm	-	3.8	6.2	219	23	16.9	1.8	3481	394	na	na	na	na	na	na	na	0.6	na	na	na	na	46.3	16.8	8.72	13.6	11.2	0.12	na	2.6	na	na	na	na	na	na
This-Study		14053	14053-19	Apollo-14	Basalt	Low-Ti- Hi-Al Basalt	Hi-Al-Basalt	Coarse-Grained	Ophitic	Apatite	∥-to-c-axis	Ap003c	Mesostasis	anhedral ~50 μm	In proximity	2.4	8.1	48	5	18.2	2.8	1363	154	na	na	na	na	na	na	na	0.6	na	na	na	na	46.3	16.8	8.72	13.6	11.2	0.12	na	2.6	na	na	na	na	na	na
This-Study		14053	14053-19	Apollo-14	Basalt	Low-Ti- Hi-Al Basalt	Hi-Al-Basalt	Coarse-Grained	Ophitic	Apatite	∥-to-c-axis	Ap003a	Mesostasis	anhedral ~90 μm	In proximity	-5.9	10.5	41	4	21.3	3	1081	122	na	na	na	na	na	na	na	0.6	na	na	na	na	46.3	16.8	8.72	13.6	11.2	0.12	na	2.6	na	na	na	na	na	na
This-Study		14053	14053-19	Apollo-14	Basalt	Low-Ti- Hi-Al Basalt	Hi-Al-Basalt	Coarse-Grained	Ophitic	Apatite	∥-to-c-axis	Ap008	Mesostasis	anhedral ~40 μm	Adjacent ~5 μm FeS	3.1	5.9	229	24	17.4	1.6	3108	352	na	na	na	na	na	na	na	0.6	na	na	na	na	46.3	16.8	8.72	13.6	11.2	0.12	na	2.6	na	na	na	na	na	na
This-Study		15016	15016-7	Apollo-15	Basalt	Olivine-Norm-Basalt	Olivine-Norm-Basalt	Medium-Grained	Vescicular-Large-Vescicles	Apatite	∥-to-c-axis	Ap5	Mesostasis	anhedral ~30 μm	Surrounded by ~10 μm FeS	32.9	5.9	181	42	6.5	0.9	2629	183		Tr005	mesostasis-w-ap	0.7	1.2			0.88	na	-1.6	na	860	44	22.6	11.1	8.4	9.4	0.03	0.21	2.3	na	na	na	na	na	na
This-Study		15016	15016-7	Apollo-15	Basalt	Olivine-Norm-Basalt	Olivine-Norm-Basalt	Medium-Grained	Vescicular-Large-Vescicles	Apatite	∥-to-c-axis	Ap28	Mesostasis	subhedral ~20 μm	-	32.7	6.4	311	73	6.7	1.4	7228	503	na	na	na	na	na	na	na	0.88	na	-1.6	na	860	44	22.6	11.1	8.4	9.4	0.03	0.21	2.3	na	na	na	na	na	na
This-Study		15016	15016-7	Apollo-15	Basalt	Olivine-Norm-Basalt	Olivine-Norm-Basalt	Medium-Grained	Vescicular-Large-Vescicles	Apatite	∥-to-c-axis	Ap42_rim	Enclosed-in-Px	euhedral ~10 μm	-	30.5	5.1	2763	645	19.1	3.8	687	48	na	na	na	na	na	na	na	0.88	na	-1.6	na	860	44	22.6	11.1	8.4	9.4	0.03	0.21	2.3	na	na	na	na	na	na
This-Study		15016	15016-7	Apollo-15	Basalt	Olivine-Norm-Basalt	Olivine-Norm-Basalt	Medium-Grained	Vescicular-Large-Vescicles	Apatite	∥-to-c-axis	Ap42_core	Enclosed-in-Px	euhedral ~10 μm	-	28.9	8.3	1212	283	17.4	2.1	3191	222						0.525		0.88	na	-1.6	na	860	44	22.6	11.1	8.4	9.4	0.03	0.21	2.3	na	na	na	na	na	na
This-Study		15016	15016-7	Apollo-15	Basalt	Olivine-Norm-Basalt	Olivine-Norm-Basalt	Medium-Grained	Vescicular-Large-Vescicles	Apatite	∥-to-c-axis	Ap6	Mesostasis	euhedral ~15 μm	Enclosed by ~90 μm FeS	36.4	3.2	2797	653	12.5	2.9	350	24		Tr006_1	matrix-large-including-ap	0.8	1.2	0.268095		0.88	na	-1.6	na	860	44	22.6	11.1	8.4	9.4	0.03	0.21	2.3	na	na	na	na	na	na
This-Study		15016	15016-7	Apollo-15	Basalt	Olivine-Norm-Basalt	Olivine-Norm-Basalt	Medium-Grained	Vescicular-Large-Vescicles	Apatite	∥-to-c-axis	Ap6	Mesostasis			36.4	3.2	2797	653	12.5	2.9	350	24		Tr006_2	matrix-large-including-ap	0.1	1.2			0.88	na	-1.6	na	860	44	22.6	11.1	8.4	9.4	0.03	0.21	2.3	na	na	na	na	na	na
This-Study		15016	15016-7	Apollo-15	Basalt	Olivine-Norm-Basalt	Olivine-Norm-Basalt	Medium-Grained	Vescicular-Large-Vescicles	Apatite	∥-to-c-axis	Ap6	Mesostasis			36.4	3.2	2797	653	12.5	2.9	350	24		Tr006_3	matrix-large-including-ap	0.5	1.2			0.88	na	-1.6	na	860	44	22.6	11.1	8.4	9.4	0.03	0.21	2.3	na	na	na	na	na	na
This-Study		15058	15058-15	Apollo-15	Basalt	Quartz-Norm-Basalt	Pigeonite-Basalt	Coarse-Grained	Porphyritic	Apatite	∥-to-c-axis	Ap016	Mesostasis	anhedral ~50 μm	-	-0.2	2.7	301	49	8.8	1.3	818	31	na	na	na	na	na	na	na	na	na	-0.5	na	970	47.8	20	9	8.9	10.3	0.03	0.28	1.8	na	na	na	na	na	na
This-Study		15058	15058-15	Apollo-15	Basalt	Quartz-Norm-Basalt	Pigeonite-Basalt	Coarse-Grained	Porphyritic	Apatite	∥-to-c-axis	Ap017	Mesostasis	subhedral ~30 μm	In proximity	4.1	5.8	51	8	12.3	0.9	818	31	na	na	na	na	na	na	na	na	na	-0.5	na	970	47.8	20	9	8.9	10.3	0.03	0.28	1.8	na	na	na	na	na	na
This-Study		15058	15058-15	Apollo-15	Basalt	Quartz-Norm-Basalt	Pigeonite-Basalt	Coarse-Grained	Porphyritic	Apatite	∥-to-c-axis	Ap002	Enclosed-in-Px	subhedral ~30 μm	-	6.5	5.2	98	16	9.3	0.9	1215	46	na	na	na	na	na	na	na	na	na	-0.5	na	970	47.8	20	9	8.9	10.3	0.03	0.28	1.8	na	na	na	na	na	na
This-Study		15058	15058-15	Apollo-15	Basalt	Quartz-Norm-Basalt	Pigeonite-Basalt	Coarse-Grained	Porphyritic	Apatite	∥-to-c-axis	Ap003	Mesostasis	subhedral ~30 μm	Adjacent ~25 μm FeS	1.5	3.5	186	30	10	0.7	2652	101	na	na	na	na	na	na	na	na	na	-0.5	na	970	47.8	20	9	8.9	10.3	0.03	0.28	1.8	na	na	na	na	na	na
This-Study		15058	15058-15	Apollo-15	Basalt	Quartz-Norm-Basalt	Pigeonite-Basalt	Coarse-Grained	Porphyritic	Apatite	∥-to-c-axis	Ap007	Enclosed-in-Px	anhedral ~40 μm	-	-10.5	5.9	64	10	10.3	0.9	1701	65	na	na	na	na	na	na	na	na	na	-0.5	na	970	47.8	20	9	8.9	10.3	0.03	0.28	1.8	na	na	na	na	na	na
This-Study		15058	15058-15	Apollo-15	Basalt	Quartz-Norm-Basalt	Pigeonite-Basalt	Coarse-Grained	Porphyritic	Apatite	∥-to-c-axis	Ap012a	Enclosed-in-Px	euhedral ~20 μm	-	-7.9	3.2	472	76	9.5	1.5	2307	88	na	na	na	na	na	na	na	na	na	-0.5	na	970	47.8	20	9	8.9	10.3	0.03	0.28	1.8	na	na	na	na	na	na
This-Study		15065	15065-85	Apollo-15	Basalt	Quartz-Norm-Basalt	Gabbroic-Basalt	Very-Coarse-Grained	Vuggy?	Apatite	∥-to-c-axis	Ap001b	Enclosed-in-Px	anhedral ~80 μm	-	-18	2.8	341	55	10.7	1.4	5373	204	na	na	na	na	na	na	na	na	na	-0.9	na	600	48.5	19.3	10.6	9.3	9.9	0.05	0.34	1.48	na	na	na	na	na	na
This-Study		15065	15065-85	Apollo-15	Basalt	Quartz-Norm-Basalt	Gabbroic-Basalt	Very-Coarse-Grained	Vuggy?	na	na	na	na	na	na	na	na	na	na	na	na	na	na	na	Tr002b	mesostasis	-0.2	1.2	na	na	na	na	-0.9	na	600	48.5	19.3	10.6	9.3	9.9	0.05	0.34	1.48	na	na	na	na	na	na
This-Study		15065	15065-85	Apollo-15	Basalt	Quartz-Norm-Basalt	Gabbroic-Basalt	Very-Coarse-Grained	Vuggy?	Apatite	∥-to-c-axis	Ap003	Mesostasis	anhedral ~50 μm	-	-14.1	2.6	978	158	10	1.5	2778	105		Tr003a2_1	mesostasis	-0.1	1.2	na	na	na	na	-0.9	na	600	48.5	19.3	10.6	9.3	9.9	0.05	0.34	1.48	na	na	na	na	na	na
This-Study		15065	15065-85	Apollo-15	Basalt	Quartz-Norm-Basalt	Gabbroic-Basalt	Very-Coarse-Grained	Vuggy?	Apatite	∥-to-c-axis	Ap003	Mesostasis	anhedral ~50 μm	-	-14.1	2.6	978	158	10	1.5	2778	105		Tr003a2_2	mesostasis	0.8	1.2	na	na	na	na	-0.9	na	600	48.5	19.3	10.6	9.3	9.9	0.05	0.34	1.48	na	na	na	na	na	na
This-Study		15065	15065-85	Apollo-15	Basalt	Quartz-Norm-Basalt	Gabbroic-Basalt	Very-Coarse-Grained	Vuggy?	Apatite	∥-to-c-axis	Ap004	Mesostasis	euhedral ~40 μm	-	-22	4.4	72	12	8.2	1.6	802	30		Tr004	mesostasis-w-ap	0.3	1.2	na	na	na	na	-0.9	na	600	48.5	19.3	10.6	9.3	9.9	0.05	0.34	1.48	na	na	na	na	na	na
This-Study		15065	15065-85	Apollo-15	Basalt	Quartz-Norm-Basalt	Gabbroic-Basalt	Very-Coarse-Grained	Vuggy?	Apatite	∥-to-c-axis	Ap005b_core	Mesostasis	euhedral ~40 μm	-	-18	2.4	1501	243	8.2	1.2	1449	55	na	na	na	na	na	na	na	na	na	-0.9	na	600	48.5	19.3	10.6	9.3	9.9	0.05	0.34	1.48	na	na	na	na	na	na
This-Study		15065	15065-85	Apollo-15	Basalt	Quartz-Norm-Basalt	Gabbroic-Basalt	Very-Coarse-Grained	Vuggy?	Apatite	∥-to-c-axis	Ap005b_rim	Mesostasis	subhedral ~30 μm	Adjacent ~60 μm FeS	-27.4	6.5	412	67	8.7	1.8	2016	77	na	na	na	0.2	na	na	na	na	na	-0.9	na	600	48.5	19.3	10.6	9.3	9.9	0.05	0.34	1.48	na	na	na	na	na	na
This-Study		15065	15065-85	Apollo-15	Basalt	Quartz-Norm-Basalt	Gabbroic-Basalt	Very-Coarse-Grained	Vuggy?	Apatite	∥-to-c-axis	Ap006	Mesostasis	subhedral ~40 μm	-	-33.3	3.8	67	11	13	1.4	1050	40	9.475	na	na	na	na	na	na	na	na	-0.9	na	600	48.5	19.3	10.6	9.3	9.9	0.05	0.34	1.48	na	na	na	na	na	na
This-Study		15065	15065-85	Apollo-15	Basalt	Quartz-Norm-Basalt	Gabbroic-Basalt	Very-Coarse-Grained	Vuggy?	Apatite	∥-to-c-axis	Ap007	Mesostasis			-29.1	2.4	903	146	7	1	2686	102	na	na	na	na	na	na	na	na	na	-0.9	na	600	48.5	19.3	10.6	9.3	9.9	0.05	0.34	1.48	na	na	na	na	na	na
This-Study		15085	15085-15	Apollo-15	Basalt	Quartz-Norm-Basalt	Pigeonite-Basalt	Coarse-Grained	Vuggy	Apatite	∥-to-c-axis	Ap001a	Enclosed-in-Px	subhedral ~60 μm	-	-11.4	2.4	59	7	36.5	1.1	1874	91	na	na	na	na	na	na	na	na	na	-1.3	na	855	46.4	26.8	8.2	5.8	9.1	0.07	0.21	3.07	na	na	na	na	na	na
This-Study		15085	15085-15	Apollo-15	Basalt	Quartz-Norm-Basalt	Pigeonite-Basalt	Coarse-Grained	Vuggy	Apatite	∥-to-c-axis	Ap001b	Enclosed-in-Px	subhedral > ~200 μm	-	-10.8	2.4	63	7	28.3	1.1	2097	101	na	na	na	na	na	na	na	na	na	-1.3	na		46.4	26.8	8.2	5.8	9.1	0.07	0.21	3.07	na	na	na	na	na	na
This-Study		15085	15085-15	Apollo-15	Basalt	Quartz-Norm-Basalt	Pigeonite-Basalt	Coarse-Grained	Vuggy	Apatite	∥-to-c-axis	Ap012a	Mesostasis							17.7	2.1	564	27	na	na	na	na	na	na	na	na	na	-1.3	na	855	46.4	26.8	8.2	5.8	9.1	0.07	0.21	3.07	na	na	na	na	na	na
This-Study		15386	15386-46	Apollo-15	KREEP-Basalt	Pristine-KREEP-basalt	KREEP-basalt	Subophitic	Subophitic	Apatite	∥-to-c-axis	Ap1	Mesostasis	subhedral ~60 μm	-	-1.4	4.4	77	6	20.4	2.6	3189	142	na	na	na	na	na	na	na	na	na	na	na	na	50.8	10.6	8.2	14.8	9.7	0.7	0.7	2.2	na	na	na	na	na	na
This-Study		15386	15386-46	Apollo-15	KREEP-Basalt	Pristine-KREEP-basalt	KREEP-basalt	Subophitic	Subophitic	Apatite	∥-to-c-axis	Ap3	Mesostasis	subhedral > ~100 μm	-	-3.9	4.2	51	4	20.1	2.6	2623	117	na	na	na	na	na	na	na	na	na	na	na	na	50.8	10.6	8.2	14.8	9.7	0.7	0.7	2.2	na	na	na	na	na	na
This-Study		15386	15386-46	Apollo-15	KREEP-Basalt	Pristine-KREEP-basalt	KREEP-basalt	Subophitic	Subophitic	Apatite	∥-to-c-axis	Ap6	Mesostasis	subhedral > ~200 μm	-	-0.4	3.8	89	7	18.7	2.6	2978	132	na	na	na	na	na	na	na	na	na	na	na	na	50.8	10.6	8.2	14.8	9.7	0.7	0.7	2.2	na	na	na	na	na	na
This-Study		15475	15475-17	Apollo-15	Basalt	Quartz-Norm-Basalt	Pigeonite-Basalt	Porphyritic	Vuggy	Apatite	∥-to-c-axis	Ap002	Mesostasis	subhedral ~50 μm	-	-0.2	2.3	128	14	13.8	1	4070	197	na	na	na	na	na	na	na	na		na	na	na	47.8	20	8.3	9.5	10.7	0.04	0.24	2	na	na	na	na	na	na
This-Study		15475	15475-17	Apollo-15	Basalt	Quartz-Norm-Basalt	Pigeonite-Basalt	Porphyritic	Vuggy	Apatite	∥-to-c-axis	Ap003b	Mesostasis	anhedral ~50 μm	Adjacent ~10 μm FeS	-2.3	2	348	39	22.7	1.6	4316	209	na	na	na	na	na	na	na	na	na	na	na	na	47.8	20	8.3	9.5	10.7	0.04	0.24	2	na	na	na	na	na	na
This-Study		15475	15475-17	Apollo-15	Basalt	Quartz-Norm-Basalt	Pigeonite-Basalt	Porphyritic	Vuggy	Apatite	∥-to-c-axis	Ap004a	Mesostasis	euhedral ~40 μm	Adjacent ~ 40 μm & in proximity ~130 μm FeS	-8.8	2.5	87	10	34.4	2.7	1235	60	na	na	na	na	na	na	na	na	na	na	na	na	47.8	20	8.3	9.5	10.7	0.04	0.24	2	na	na	na	na	na	na
This-Study		15475	15475-17	Apollo-15	Basalt	Quartz-Norm-Basalt	Pigeonite-Basalt	Porphyritic	Vuggy	Apatite	∥-to-c-axis	Ap005a	Mesostasis	anhedral ~120 μm	In proximity	-7.8	2.4	71	8	14.4	1.2	1718	83		Tr005_1	mesostasis-w-ap	-0.2	0.9	na	na	na	na	na	na	na	47.8	20	8.3	9.5	10.7	0.04	0.24	2	na	na	na	na	na	na
This-Study		15475	15475-17	Apollo-15	Basalt	Quartz-Norm-Basalt	Pigeonite-Basalt	Porphyritic	Vuggy	Apatite	∥-to-c-axis	Ap005a	Mesostasis	anhedral ~120 μm	In proximity	-7.8	2.4	71	8	14.4	1.2	1718	83		Tr005_2	mesostasis-w-ap	0.8	0.9	na	na	na	na	na	na	na	47.8	20	8.3	9.5	10.7	0.04	0.24	2	na	na	na	na	na	na
This-Study		15475	15475-17	Apollo-15	Basalt	Quartz-Norm-Basalt	Pigeonite-Basalt	Porphyritic	Vuggy	Apatite	∥-to-c-axis	Ap001a	Mesostasis	subhedral ~30 μm	In proximity ~130 μm FeS	-7	2.8	49	5	16.3	1.4	1126	54	na	na	na	na	na	na	na	na	na	na	na	na	47.8	20	8.3	9.5	10.7	0.04	0.24	2	na	na	na	na	na	na
This-Study		15475	15475-17	Apollo-15	Basalt	Quartz-Norm-Basalt	Pigeonite-Basalt	Porphyritic	Vuggy	Apatite	∥-to-c-axis	Ap004b	Mesostasis	subhedral ~30 μm	In proximity ~130 μm FeS	2.6	2.5	115	13	15.2	1.6	1979	96		Tr004_1	mesostasis-w-ap	0.4	0.9	na	na	na	na	na	na	na	47.8	20	8.3	9.5	10.7	0.04	0.24	2	na	na	na	na	na	na
This-Study		15475	15475-17	Apollo-15	Basalt	Quartz-Norm-Basalt	Pigeonite-Basalt	Porphyritic	Vuggy	Apatite	∥-to-c-axis	Ap004b	Mesostasis	subhedral ~30 μm	In proximity ~130 μm FeS	2.6	2.5	115	13	15.2	1.6	1979	96		Tr004_2	mesostasis-w-ap	0.7	0.9	na	na	na	na	na	na	na	47.8	20	8.3	9.5	10.7	0.04	0.24	2	na	na	na	na	na	na
This-Study		15475	15475-17	Apollo-15	Basalt	Quartz-Norm-Basalt	Pigeonite-Basalt	Porphyritic	Vuggy	Apatite	∥-to-c-axis	Ap004b	Mesostasis	subhedral ~30 μm	In proximity ~130 μm FeS	2.6	2.5	115	13	15.2	1.6	1979	96		Tr004_3	mesostasis-w-ap	0.4	1	na	na	na	na	na	na	na	47.8	20	8.3	9.5	10.7	0.04	0.24	2	na	na	na	na	na	na
This-Study		15475	15475-127	Apollo-15	Basalt	Quartz-Norm-Basalt	Pigeonite-Basalt	Porphyritic	Vuggy	Apatite	∥-to-c-axis	Ap001	Enclosed-in-Px	anhedral ~200 μm	-	0.725304	5.42477	32.8686	3.20258	na	na	na	na	na	na	na	na	na	na	na	na	na	na	na	na	47.8	20	8.3	9.5	10.7	0.04	0.24	2	na	na	na	na	na	na
This-Study		15475	15475-127	Apollo-15	Basalt	Quartz-Norm-Basalt	Pigeonite-Basalt	Porphyritic	Vuggy	Apatite	∥-to-c-axis	Ap002	Mesostasis	anhedral ~100 μm	In proximity	3.69215	0.960616	2332.2	227.24	na	na	na	na	na	na	na	0.42	na	na	na	na	na	na	na	na	47.8	20	8.3	9.5	10.7	0.04	0.24	2	na	na	na	na	na	na
This-Study		15475	15475-127	Apollo-15	Basalt	Quartz-Norm-Basalt	Pigeonite-Basalt	Porphyritic	Vuggy	Apatite	∥-to-c-axis	Ap003a	Mesostasis	subhedral ~50 μm	In proximity	2.86147	1.18673	1329.44	129.535	na	na	na	na	na	na	na	na	na	na	na	na	na	na	na	na	47.8	20	8.3	9.5	10.7	0.04	0.24	2	na	na	na	na	na	na
This-Study		15475	15475-127	Apollo-15	Basalt	Quartz-Norm-Basalt	Pigeonite-Basalt	Porphyritic	Vuggy	Apatite	∥-to-c-axis	Ap003b	Mesostasis	subhedral ~50 μm	In proximity	-1.23286	1.30184	646.44	62.9865	na	na	na	na	na	na	na	na	na	na	na	na	na	na	na	na	47.8	20	8.3	9.5	10.7	0.04	0.24	2	na	na	na	na	na	na
This-Study		15555	15555-991	Apollo-15	Basalt	Olivine-Norm-Basalt	Olivine-Norm-Basalt	Porphyritic	Vuggy	Apatite	∥-to-c-axis	Ap005a	Mesostasis	subhedral > ~100 μm	Adjacent ~70 μm FeS	-14.7	2.8	157	18	21.1	1.6	2354	310	na	na	na	na	na	na	na	na	na	-0.3	na	855	44.2	22.4	11.1	8.48	9.5	0.03	0.24	2.3	na	na	na	na	na	na
This-Study		15555	15555-991	Apollo-15	Basalt	Olivine-Norm-Basalt	Olivine-Norm-Basalt	Porphyritic	Vuggy	Apatite	∥-to-c-axis	Ap013a	Mesostasis	anhedral ~15 μm	-	3.4	4.6	48	5	10.4	2.3	1028	135	na	na	na	na	na	na	na	na	na		na	855	44.2	22.4	11.1	8.48	9.5	0.03	0.24	2.3	na	na	na	na	na	na
This-Study		15555	15555-991	Apollo-15	Basalt	Olivine-Norm-Basalt	Olivine-Norm-Basalt	Porphyritic	Vuggy	Apatite	∥-to-c-axis	Ap017	Mesostasis	anhedral ~30 μm	In proximity	5.5	4.2	47	5	11.7	1.4	1900	250	na	na	na	na	na	na	na	na	na	-0.3	na	855	44.2	22.4	11.1	8.48	9.5	0.03	0.24	2.3	na	na	na	na	na	na
This-Study		15556	15556-137	Apollo-15	Basalt	Olivine-Norm-Basalt	Olivine-Norm-Basalt	Fine-Grained	Vescicular	Apatite	∥-to-c-axis	Ap001	Mesostasis	anhedral ~20 μm	Enclosed ~40 μm FeS	2.7	1.2	2806	317	14.6	2.2	853	41		Tr001	mesostasis-w-ap	0.9	0.8	na	na	na	na	0.9	na	965	46.2	21.7	8	9.9	10.7	0.09	0.3	2.6	na	na	na	na	na	na
This-Study		15556	15556-137	Apollo-15	Basalt	Olivine-Norm-Basalt	Olivine-Norm-Basalt	Fine-Grained	Vescicular	Apatite	∥-to-c-axis	Ap001	Mesostasis	anhedral ~20 μm	Enclosed ~40 μm FeS	2.7	1.2	2806	317	14.6	2.2	853	41		Tr003_1	mesostasis-w-ap	-0.5	0.8	na	na	na	na	0.9	na	965	46.2	21.7	8	9.9	10.7	0.09	0.3	2.6	na	na	na	na	na	na
This-Study		15556	15556-137	Apollo-15	Basalt	Olivine-Norm-Basalt	Olivine-Norm-Basalt	Fine-Grained	Vescicular	Apatite	∥-to-c-axis	Ap003	Mesostasis	anhedral ~35 μm	Adjacent ~60 μm FeS	6.4	1.2	1473	167	29.5	1.9	2365	114		Tr003_2	mesostasis-w-ap	-0.5	0.8	na	na	na	na	0.9	na	965	46.2	21.7	8	9.9	10.7	0.09	0.3	2.6	na	na	na	na	na	na
This-Study		15556	15556-137	Apollo-15	Basalt	Olivine-Norm-Basalt	Olivine-Norm-Basalt	Fine-Grained	Vescicular	Apatite	∥-to-c-axis	Ap002	Mesostasis	anhedral ~30 μm	Adjacent ~40 μm FeS	10.6	3.2	119	13						Tr002	mesostasis-w-ap	1.2	0.8	na	na	na	na	0.9	na	965	46.2	21.7	8	9.9	10.7	0.09	0.3	2.6	na	na	na	na	na	na
This-Study		67915	67915-75	Apollo-16	Breccia	Feldspathic-Polymict-Breccia	Feldspathic-Polymict-Breccia	Breccia	Breccia	Apatite	∥-to-c-axis	Ap3a	Matrix	anhedral ~50 μm	In proximity	0.537882	5.39599	12	2	na	na	na	na	na	na	na	na	na	na	na	na	na	na	na	na	na	na	na	na	na	na	na	na	na	na	na	na	na	na
This-Study		67915	67915-75	Apollo-16	Breccia	Feldspathic-Polymict-Breccia	Feldspathic-Polymict-Breccia	Breccia	Breccia	Apatite	∥-to-c-axis	Ap3b	Matrix	anhedral ~90 μm	Adjacent < ~10 μm FeS	-0.848177	5.45183	14.057	2.00814	na	na	na	na	na	na	na	na	na	na	na	na	na	na	na	na	na	na	na	na	na	na	na	na	na	na	na	na	na	na
This-Study		67915	67915-75	Apollo-16	Breccia	Feldspathic-Polymict-Breccia	Feldspathic-Polymict-Breccia	Breccia	Breccia	Apatite	∥-to-c-axis	Ap4	Matrix	anhedral ~60 μm	-	1.22223	8.40741	6.12701	0.875287	na	na	na	na	na	na	na	na	na	na	na	na	na	na	na	na	na	na	na	na	na	na	na	na	na	na	na	na	na	na
This-Study		67915	67915-75	Apollo-16	Breccia	Feldspathic-Polymict-Breccia	Feldspathic-Polymict-Breccia	Breccia	Breccia	Apatite	∥-to-c-axis	Ap5a	Matrix	anhedral ~70 μm	-	3.04666	5.64655	18.2706	2.61009	na	na	na	na	na	na	na	na	na	na	na	na	na	na	na	na	na	na	na	na	na	na	na	na	na	na	na	na	na	na
This-Study		67915	67915-75	Apollo-16	Breccia	Feldspathic-Polymict-Breccia	Feldspathic-Polymict-Breccia	Breccia	Breccia	Apatite	∥-to-c-axis	Ap5b	Matrix	anhedral ~85 μm	-	0.496455	4.83913	18.2335	2.60479	na	na	na	na	na	na	na	na	na	na	na	na	na	na	na	na	na	na	na	na	na	na	na	na	na	na	na	na	na	na
This-Study		67915	67915-75	Apollo-16	Breccia	Feldspathic-Polymict-Breccia	Feldspathic-Polymict-Breccia	Breccia	Breccia	Apatite	∥-to-c-axis	Ap5c	Matrix	anhedral ~40 μm	-	-0.449248	4.70384	12.8115	1.83021	na	na	na	na	na	na	na	na	na	na	na	na	na	na	na	na	na	na	na	na	na	na	na	na	na	na	na	na	na	na
This-Study		67915	67915-75	Apollo-16	Breccia	Feldspathic-Polymict-Breccia	Feldspathic-Polymict-Breccia	Breccia	Breccia	Apatite	∥-to-c-axis	Ap6	Matrix	anhedral ~75 μm	-	1.71315	2.79735	43	6	na	na	na	na	na	na	na	na	na	na	na	na	na	na	na	na	na	na	na	na	na	na	na	na	na	na	na	na	na	na
This-Study		79215	79215-50	Apollo-17	Granulite	Feldspathic-Granulitic-Impactite	Feldspathic-Granulitic-Impactite	Holocrystalline	Holocrystalline	Apatite	∥-to-c-axis	Ap001a	Matrix-Troctolite-Clast	anhedral ~160 μm	-	5.6	4.4	141	15	34.6	0.9	5766	219	na	na	na	na	na	na	na	na	na	na	na	na	43.8	4.6	6.3	27.7	15.9	0.1	0.5	0.3	na	na	na	na	na	na
This-Study		79215	79215-50	Apollo-17	Granulite	Feldspathic-Granulitic-Impactite	Feldspathic-Granulitic-Impactite	Holocrystalline	Holocrystalline	Apatite	∥-to-c-axis	Ap002	Matrix-Troctolite-Clast	anhedral ~140 μm	-	4.8	7.7	96	10	33.7	0.9	5758	218	na	na	na	na	na	na	na	na	na	na	na	na	43.8	4.6	6.3	27.7	15.9	0.1	0.5	0.3	na	na	na	na	na	na
This-Study		79215	79215-50	Apollo-17	Granulite	Feldspathic-Granulitic-Impactite	Feldspathic-Granulitic-Impactite	Holocrystalline	Holocrystalline	Apatite	∥-to-c-axis	Ap004	Matrix-Troctolite-Clast	anhedral ~280 μm	-	-3.6	5.1	144	15	33.5	0.8	5880	223	na	na	na	na	na	na	na	na	na	na	na	na	43.8	4.6	6.3	27.7	15.9	0.1	0.5	0.3	na	na	na	na	na	na
This-Study		79215	79215-50	Apollo-17	Granulite	Feldspathic-Granulitic-Impactite	Feldspathic-Granulitic-Impactite	Holocrystalline	Holocrystalline	Apatite	∥-to-c-axis	Ap005	Matrix-Troctolite-Clast	anhedral ~140 μm	-	3.1	5.2	126	13	34.4	0.9	5751	218	na	na	na	na	na	na	na	na	na	na	na	na	43.8	4.6	6.3	27.7	15.9	0.1	0.5	0.3	na	na	na	na	na	na
This-Study		79215	79215-50	Apollo-17	Granulite	Feldspathic-Granulitic-Impactite	Feldspathic-Granulitic-Impactite	Holocrystalline	Holocrystalline	Apatite	∥-to-c-axis	Ap009	Matrix-Troctolite-Clast	anhedral ~140 μm	-	5	7.7	124	13	35.6	0.8	5917	225	na	na	na	na	na	na	na	na	na	na	na	na	43.8	4.6	6.3	27.7	15.9	0.1	0.5	0.3	na	na	na	na	na	na
This-Study		79215	79215-50	Apollo-17	Granulite	Feldspathic-Granulitic-Impactite	Feldspathic-Granulitic-Impactite	Holocrystalline	Holocrystalline	Apatite	∥-to-c-axis	Ap010	Matrix-Troctolite-Clast	anhedral ~110 μm	-	-6.4	4.9	123	13	34.9	0.8	5871	223	na	na	na	na	na	na	na	na	na	na	na	na	43.8	4.6	6.3	27.7	15.9	0.1	0.5	0.3	na	na	na	na	na	na
Li-et-al	2024	CE5C0800YJYX013GP	CE5C0800YJYX013GP	CE-5	Basalt	Basalt	Basalt	Basalt	Basalt	Apatite	∥-to-c-axis	CE5-ap3	Mesostasis					396
Li-et-al	2024	CE5C0800YJYX013GP	CE5C0800YJYX013GP	CE-5	Basalt	Basalt	Basalt	Basalt	Basalt	Apatite	∥-to-c-axis	CE5-ap4	Mesostasis					212
Li-et-al	2024	CE5C0800YJYX013GP	CE5C0800YJYX013GP	CE-5	Basalt	Basalt	Basalt	Basalt	Basalt	Apatite	∥-to-c-axis	CE5-ap8	Mesostasis					148
Li-et-al	2024	CE5C0800YJYX013GP	CE5C0800YJYX013GP	CE-5	Basalt	Basalt	Basalt	Basalt	Basalt	Apatite	∥-to-c-axis	CE5-ap9	Mesostasis					128
Li-et-al	2024	CE5C0800YJYX013GP	CE5C0800YJYX013GP	CE-5	Basalt	Basalt	Basalt	Basalt	Basalt	Apatite	∥-to-c-axis	CE5-ap10	Mesostasis					196
Li-et-al	2024	CE5C0800YJYX013GP	CE5C0800YJYX013GP	CE-5	Basalt	Basalt	Basalt	Basalt	Basalt	Apatite	∥-to-c-axis	CE5-1-AP-41	Mesostasis					756
Li-et-al	2024	CE5C0800YJYX013GP	CE5C0800YJYX013GP	CE-5	Basalt	Basalt	Basalt	Basalt	Basalt	Apatite	∥-to-c-axis	CE5-1-AP-42	Mesostasis					463
Li-et-al	2024	CE5C0800YJYX013GP	CE5C0800YJYX013GP	CE-5	Basalt	Basalt	Basalt	Basalt	Basalt	Apatite	∥-to-c-axis	CE5-1-AP-47	Mesostasis					1213
Li-et-al	2024	CE5C0800YJYX013GP	CE5C0800YJYX013GP	CE-5	Basalt	Basalt	Basalt	Basalt	Basalt	Apatite	∥-to-c-axis	CE5-1-AP-48	Mesostasis					970
Li-et-al	2024	CE5C0800YJYX013GP	CE5C0800YJYX013GP	CE-5	Basalt	Basalt	Basalt	Basalt	Basalt	Apatite	∥-to-c-axis	CE5-1-AP-58	Mesostasis					3932
Li-et-al	2024	CE5C0800YJYX013GP	CE5C0800YJYX013GP	CE-5	Basalt	Basalt	Basalt	Basalt	Basalt	Apatite	∥-to-c-axis	CE5-1-AP-59	Mesostasis					750
Li-et-al	2024	CE5C0800YJYX013GP	CE5C0800YJYX013GP	CE-5	Basalt	Basalt	Basalt	Basalt	Basalt	Apatite	∥-to-c-axis	CE5-1-AP-61	Mesostasis					1529
Li-et-al	2024	CE5C0800YJYX013GP	CE5C0800YJYX013GP	CE-5	Basalt	Basalt	Basalt	Basalt	Basalt	Apatite	∥-to-c-axis	CE5-1-AP-62	Mesostasis					666
Li-et-al	2024	CE5C0800YJYX013GP	CE5C0800YJYX013GP	CE-5	Basalt	Basalt	Basalt	Basalt	Basalt	Apatite	∥-to-c-axis	CE5-1-AP-63	Mesostasis					1168
Li-et-al	2024	CE5C0800YJYX013GP	CE5C0800YJYX013GP	CE-5	Basalt	Basalt	Basalt	Basalt	Basalt	Apatite	∥-to-c-axis	CE5-ap28-big-core	Mesostasis					132
Li-et-al	2024	CE5C0800YJYX013GP	CE5C0800YJYX013GP	CE-5	Basalt	Basalt	Basalt	Basalt	Basalt	Apatite	∥-to-c-axis	CE5-ap28-big-rim	Mesostasis					656
Li-et-al	2024	CE5C0800YJYX013GP	CE5C0800YJYX013GP	CE-5	Basalt	Basalt	Basalt	Basalt	Basalt	Apatite	∥-to-c-axis	CE5-1-AP-43	Mesostasis					1703.72
Li-et-al	2024	CE5C0800YJYX013GP	CE5C0800YJYX013GP	CE-5	Basalt	Basalt	Basalt	Basalt	Basalt	Apatite	∥-to-c-axis	CE5-1-AP-44	Mesostasis					767.237
Li-et-al	2024	CE5C0800YJYX013GP	CE5C0800YJYX013GP	CE-5	Basalt	Basalt	Basalt	Basalt	Basalt	Apatite	∥-to-c-axis	CE5-1-AP-45	Mesostasis					146.678
Li-et-al	2024	CE5C0800YJYX013GP	CE5C0800YJYX013GP	CE-5	Basalt	Basalt	Basalt	Basalt	Basalt	Apatite	∥-to-c-axis	CE5-1-AP-46	Mesostasis					366.694
Li-et-al	2024	CE5C0800YJYX013GP	CE5C0800YJYX013GP	CE-5	Basalt	Basalt	Basalt	Basalt	Basalt	Apatite	∥-to-c-axis	CE5-1-AP-50	Mesostasis					1162.14
Li-et-al	2024	CE5C0800YJYX013GP	CE5C0800YJYX013GP	CE-5	Basalt	Basalt	Basalt	Basalt	Basalt	Apatite	∥-to-c-axis	CE5-1-AP-31	Mesostasis					722.105
Li-et-al	2024	CE5C0800YJYX013GP	CE5C0800YJYX013GP	CE-5	Basalt	Basalt	Basalt	Basalt	Basalt	Apatite	∥-to-c-axis	CE5-1-AP-32	Mesostasis					1404.72
Li-et-al	2024	CE5C0800YJYX013GP	CE5C0800YJYX013GP	CE-5	Basalt	Basalt	Basalt	Basalt	Basalt	Apatite	∥-to-c-axis	CE5-1-AP-33	Mesostasis					2420.18
Li-et-al	2024	CE5C0800YJYX013GP	CE5C0800YJYX013GP	CE-5	Basalt	Basalt	Basalt	Basalt	Basalt	Apatite	∥-to-c-axis	CE5-1-AP-34	Mesostasis					2634.56
Li-et-al	2024	CE5C0800YJYX013GP	CE5C0800YJYX013GP	CE-5	Basalt	Basalt	Basalt	Basalt	Basalt	Apatite	∥-to-c-axis	CE5-1-AP-35	Mesostasis					3052.02
Li-et-al	2024	CE5C0800YJYX013GP	CE5C0800YJYX013GP	CE-5	Basalt	Basalt	Basalt	Basalt	Basalt	Apatite	∥-to-c-axis	CE5-1-AP-36	Mesostasis					2431.46
Li-et-al	2024	CE5C0800YJYX013GP	CE5C0800YJYX013GP	CE-5	Basalt	Basalt	Basalt	Basalt	Basalt	Apatite	∥-to-c-axis	CE5-1-AP-37	Mesostasis					2301.71
Li-et-al	2024	CE5C0800YJYX013GP	CE5C0800YJYX013GP	CE-5	Basalt	Basalt	Basalt	Basalt	Basalt	Apatite	∥-to-c-axis	CE5-ap23-core	Mesostasis					200
Li-et-al	2024	CE5C0800YJYX013GP	CE5C0800YJYX013GP	CE-5	Basalt	Basalt	Basalt	Basalt	Basalt	Apatite	∥-to-c-axis	CE5-ap23-mantle	Mesostasis					188
Li-et-al	2024	CE5C0800YJYX013GP	CE5C0800YJYX013GP	CE-5	Basalt	Basalt	Basalt	Basalt	Basalt	Apatite	∥-to-c-axis	CE5-ap23-rim	Mesostasis					776
Li-et-al	2024	CE5C0800YJYX013GP	CE5C0800YJYX013GP	CE-5	Basalt	Basalt	Basalt	Basalt	Basalt	Apatite	∥-to-c-axis	CE5-ap24-core	Mesostasis					288
Li-et-al	2024	CE5C0800YJYX013GP	CE5C0800YJYX013GP	CE-5	Basalt	Basalt	Basalt	Basalt	Basalt	Apatite	∥-to-c-axis	CE5-ap25-core	Mesostasis					804
Li-et-al	2024	CE5C0800YJYX013GP	CE5C0800YJYX013GP	CE-5	Basalt	Basalt	Basalt	Basalt	Basalt	Apatite	∥-to-c-axis	CE5-ap25-mantle1	Mesostasis					2444
Li-et-al	2024	CE5C0800YJYX013GP	CE5C0800YJYX013GP	CE-5	Basalt	Basalt	Basalt	Basalt	Basalt	Apatite	∥-to-c-axis	CE5-ap25-mantle2	Mesostasis					2564
Li-et-al	2024	CE5C0800YJYX013GP	CE5C0800YJYX013GP	CE-5	Basalt	Basalt	Basalt	Basalt	Basalt	Apatite	∥-to-c-axis	CE5-ap26-rim	Mesostasis					268
Li-et-al	2024	CE5C0800YJYX013GP	CE5C0800YJYX013GP	CE-5	Basalt	Basalt	Basalt	Basalt	Basalt	Apatite	∥-to-c-axis	CE5-ap27-rim	Mesostasis					288
Li-et-al	2024	CE5C0800YJYX013GP	CE5C0800YJYX013GP	CE-5	Basalt	Basalt	Basalt	Basalt	Basalt	Apatite	∥-to-c-axis	CE5-ap28-core	Mesostasis					164		30.0182
Li-et-al	2024	CE5C0800YJYX013GP	CE5C0800YJYX013GP	CE-5	Basalt	Basalt	Basalt	Basalt	Basalt	Apatite	∥-to-c-axis	CE5-ap28-rim	Mesostasis					468
Barnes-et-al	2016	79215	79215	Apollo-17	Granulite	Feldspathic-Granulitic-Impactite	Feldspathic-Granulitic-Impactite	Holocrystalline	Holocrystalline	Apatite	na	79215_Ap13a								29.3	0.9	7165	523	33
Barnes-et-al	2016	79215	79215	Apollo-17	Granulite	Feldspathic-Granulitic-Impactite	Feldspathic-Granulitic-Impactite	Holocrystalline	Holocrystalline	Apatite	na	79215_Ap13b								26.6	0.9	7331	535	36
Barnes-et-al	2016	79215	79215	Apollo-17	Granulite	Feldspathic-Granulitic-Impactite	Feldspathic-Granulitic-Impactite	Holocrystalline	Holocrystalline	Apatite	na	79215_Ap13c								26.9	0.9	7036	514	32
Barnes-et-al	2016	79215	79215	Apollo-17	Granulite	Feldspathic-Granulitic-Impactite	Feldspathic-Granulitic-Impactite	Holocrystalline	Holocrystalline	Apatite	na	79215_Ap13d								28.1	0.9	7209	526	38
Barnes-et-al	2016	79215	79215	Apollo-17	Granulite	Feldspathic-Granulitic-Impactite	Feldspathic-Granulitic-Impactite	Holocrystalline	Holocrystalline	Apatite	na	79215_Ap13e								27.6	0.9	7293	533	34
Barnes-et-al	2016	79215	79215	Apollo-17	Granulite	Feldspathic-Granulitic-Impactite	Feldspathic-Granulitic-Impactite	Holocrystalline	Holocrystalline	Apatite	na	79215_Ap1_27Nov								25.1	1.8	6349	464	47
Barnes-et-al	2016	79215	79215	Apollo-17	Granulite	Feldspathic-Granulitic-Impactite	Feldspathic-Granulitic-Impactite	Holocrystalline	Holocrystalline	Apatite	na	79215_Ap1_27Novb								31.7	1.6	7561	552	156
Barnes-et-al	2016	79215	79215	Apollo-17	Granulite	Feldspathic-Granulitic-Impactite	Feldspathic-Granulitic-Impactite	Holocrystalline	Holocrystalline	Apatite	na	Ap3aCl_79215_12Feb15								34.8	2	7241	123	106
Barnes-et-al	2016	79215	79215	Apollo-17	Granulite	Feldspathic-Granulitic-Impactite	Feldspathic-Granulitic-Impactite	Holocrystalline	Holocrystalline	Apatite	na	Ap3b_79215Cl_12Feb15								36.3	2	7345	124	bdl
Barnes-et-al	2016	79215	79215	Apollo-17	Granulite	Feldspathic-Granulitic-Impactite	Feldspathic-Granulitic-Impactite	Holocrystalline	Holocrystalline	Apatite	na	Ap2aCl_79215_13Feb15								30	2	7605	94	bdl
Barnes-et-al	2016	79215	79215	Apollo-17	Granulite	Feldspathic-Granulitic-Impactite	Feldspathic-Granulitic-Impactite	Holocrystalline	Holocrystalline	Apatite	na	Ap12aCl_79215_13Feb15								33.8	2	7169	89	bdl
Barnes-et-al	2016	15555	15555	Apollo-15	Basalt	Olivine-Norm-Basalt	Olivine-Norm-Basalt	Coarse-Grained	Coarse-Grained	Apatite	na	Ap1a_15555_Cl_18Feb								12.8	1.5	3143	47	1786
Barnes-et-al	2016	15555	15555	Apollo-15	Basalt	Olivine-Norm-Basalt	Olivine-Norm-Basalt	Coarse-Grained	Coarse-Grained	Apatite	na	Ap1b_15555_Cl_18Feb								13.8	1.5	3306	50	2268
Barnes-et-al	2016	15555	15555	Apollo-15	Basalt	Olivine-Norm-Basalt	Olivine-Norm-Basalt	Coarse-Grained	Coarse-Grained	Apatite	na	Ap5b_15555_Cl_18Feb								12.7	2.1	847	13	1298
Barnes-et-al	2016	10044	10044	Apollo-11	Basalt	Hi-Ti-Basalt	Hi-Ti-Basalt	Coarse-Grained	Coarse-Grained	Apatite	na	Ap5b_10044_28Aug15								16.1	4	258	4	805
Barnes-et-al	2016	10044	10044	Apollo-11	Basalt	Hi-Ti-Basalt	Hi-Ti-Basalt	Coarse-Grained	Coarse-Grained	Apatite	na	Ap6Da_10044 28Aug15								6.8	4.5	209	3	754
Barnes-et-al	2016	10044	10044	Apollo-11	Basalt	Hi-Ti-Basalt	Hi-Ti-Basalt	Coarse-Grained	Coarse-Grained	Apatite	na	Ap6Ca_10044 28Aug15								10	3.3	375	5	716
Barnes-et-al	2016	10044	10044	Apollo-11	Basalt	Hi-Ti-Basalt	Hi-Ti-Basalt	Coarse-Grained	Coarse-Grained	Apatite	na	Ap6Cb_10044 28Aug15								6.5	2	1109	16	504
Barnes-et-al	2016	15386	15386	Apollo-15	KREEP-Basalt	KREEP-basalt	KREEP-basalt	Subophitic	Subophitic	Apatite	na	Ap5a_15386_29Aug15								30.8	1.3	3764	55	136
Barnes-et-al	2016	15386	15386	Apollo-15	KREEP-Basalt	KREEP-basalt	KREEP-basalt	Subophitic	Subophitic	Apatite	na	Ap10a_15386_29Aug15								22.5	1.5	2720	40	484
Barnes-et-al	2016	15386	15386	Apollo-15	KREEP-Basalt	KREEP-basalt	KREEP-basalt	Subophitic	Subophitic	Apatite	na	Ap2a_15386_29Aug15								14.1	2.2	987	14	198
Tartèse-et-al	2013	12039	12039-44	Apollo-12	Apollo-12	Basalt	Low-Ti-Basalt	Coarse-Grained	Ophitic	Apatite	na	Ap2#1
Tartèse-et-al	2013	12039	12039-44	Apollo-12	Apollo-12	Basalt	Low-Ti-Basalt	Coarse-Grained	Ophitic	Apatite	na	Ap2#2
Tartèse-et-al	2013	12039	12039-44	Apollo-12	Apollo-12	Basalt	Low-Ti-Basalt	Coarse-Grained	Ophitic	Apatite	na	Ap1#1
Tartèse-et-al	2013	12039	12039-44	Apollo-12	Apollo-12	Basalt	Low-Ti-Basalt	Coarse-Grained	Ophitic	Apatite	na	Ap1#2
Tartèse-et-al	2013	12039	12039-44	Apollo-12	Apollo-12	Basalt	Low-Ti-Basalt	Coarse-Grained	Ophitic	Apatite	na	Ap1#3
Tartèse-et-al	2013	12039	12039-44	Apollo-12	Apollo-12	Basalt	Low-Ti-Basalt	Coarse-Grained	Ophitic	Apatite	na	Ap1#4
Tartèse-et-al	2013	12039	12039-44	Apollo-12	Apollo-12	Basalt	Low-Ti-Basalt	Coarse-Grained	Ophitic	Apatite	na	Ap1#5
Tartèse-et-al	2013	12039	12039-44	Apollo-12	Apollo-12	Basalt	Low-Ti-Basalt	Coarse-Grained	Ophitic	Apatite	na	Ap3#1
Tartèse-et-al	2013	12039	12039-44	Apollo-12	Apollo-12	Basalt	Low-Ti-Basalt	Coarse-Grained	Ophitic	Apatite	na	Ap3#2
Tartèse-et-al	2013	12039	12039-44	Apollo-12	Apollo-12	Basalt	Low-Ti-Basalt	Coarse-Grained	Ophitic	Apatite	na	Ap5#1
Tartèse-et-al	2013	12039	12039-44	Apollo-12	Apollo-12	Basalt	Low-Ti-Basalt	Coarse-Grained	Ophitic	Apatite	na	Ap6#1
Tartèse-et-al	2013	12039	12039-44	Apollo-12	Apollo-12	Basalt	Low-Ti-Basalt	Coarse-Grained	Ophitic	Apatite	na	Ap6#2
Tartèse-et-al	2013	12039	12039-44	Apollo-12	Apollo-12	Basalt	Low-Ti-Basalt	Coarse-Grained	Ophitic	Apatite	na	Ap8#1
Tartèse-et-al	2013	15058	15058-20	Apollo-15	Basalt	Quartz-Norm-Basalt	Pigeonite-Basalt	Coarse-Grained	Porphyritic	Apatite	na	Ap1#1
Tartèse-et-al	2013	15058	15058-20	Apollo-15	Basalt	Quartz-Norm-Basalt	Pigeonite-Basalt	Coarse-Grained	Porphyritic	Apatite	na	Ap1#2
Tartèse-et-al	2013	15058	15058-20	Apollo-15	Basalt	Quartz-Norm-Basalt	Pigeonite-Basalt	Coarse-Grained	Porphyritic	Apatite	na	Ap1#3
Tartèse-et-al	2013	15058	15058-20	Apollo-15	Basalt	Quartz-Norm-Basalt	Pigeonite-Basalt	Coarse-Grained	Porphyritic	Apatite	na	Ap1#4
Tartèse-et-al	2013	15058	15058-20	Apollo-15	Basalt	Quartz-Norm-Basalt	Pigeonite-Basalt	Coarse-Grained	Porphyritic	Apatite	na	Ap1#5
Tartèse-et-al	2013	15058	15058-20	Apollo-15	Basalt	Quartz-Norm-Basalt	Pigeonite-Basalt	Coarse-Grained	Porphyritic	Apatite	na	Ap7#1
Tartèse-et-al	2013	15058	15058-20	Apollo-15	Basalt	Quartz-Norm-Basalt	Pigeonite-Basalt	Coarse-Grained	Porphyritic	Apatite	na	Ap4#1
Tartèse-et-al	2013	15058	15058-20	Apollo-15	Basalt	Quartz-Norm-Basalt	Pigeonite-Basalt	Coarse-Grained	Porphyritic	Apatite	na	Ap3#1
Tartèse-et-al	2013	15555	15555-991	Apollo-15	Basalt	Olivine-Norm-Basalt	Olivine-Norm-Basalt	Porphyritic	Vuggy	Apatite	na	Ap5#1
Tartèse-et-al	2013	15555	15555-991	Apollo-15	Basalt	Olivine-Norm-Basalt	Olivine-Norm-Basalt	Porphyritic	Vuggy	Apatite	na	Ap5#2
Tartèse-et-al	2013	15555	15555-991	Apollo-15	Basalt	Olivine-Norm-Basalt	Olivine-Norm-Basalt	Porphyritic	Vuggy	Apatite	na	Ap2#1
Tartèse-et-al	2013	15555	15555-991	Apollo-15	Basalt	Olivine-Norm-Basalt	Olivine-Norm-Basalt	Porphyritic	Vuggy	Apatite	na	Ap1#1
Tartèse-et-al	2013	15555	15555-991	Apollo-15	Basalt	Olivine-Norm-Basalt	Olivine-Norm-Basalt	Porphyritic	Vuggy	Apatite	na	Ap1#2
Tartèse-et-al	2013	15555	15555-991	Apollo-15	Basalt	Olivine-Norm-Basalt	Olivine-Norm-Basalt	Porphyritic	Vuggy	Apatite	na	Ap1#3
This-Study		15556	15556-137	Apollo-15	Basalt	Olivine-Norm-Basalt	Olivine-Norm-Basalt	Fine-Grained		Troilite	na	Tr003_1	With-Ap			-0.476067	0.821566
This-Study		15556	15556-137	Apollo-15	Basalt	Olivine-Norm-Basalt	Olivine-Norm-Basalt	Fine-Grained		Troilite	na	Tr003_2	With-Ap			-0.507072	0.826692
This-Study		15556	15556-137	Apollo-15	Basalt	Olivine-Norm-Basalt	Olivine-Norm-Basalt	Fine-Grained		Troilite	na	Tr002	With-Ap			1.19601	0.834464
This-Study		15556	15556-137	Apollo-15	Basalt	Olivine-Norm-Basalt	Olivine-Norm-Basalt	Fine-Grained		Troilite	na	Tr001	With-Ap			0.888175	0.844982
This-Study		12039	12039-45	Apollo-12	Basalt	Low-Ti-Basalt	Pigeonite-Basalt	Coarse-Grained		Troilite	na	Tr004_1				0.728718	0.811455
This-Study		12039	12039-45	Apollo-12	Basalt	Low-Ti-Basalt	Pigeonite-Basalt	Coarse-Grained		Troilite	na	Tr004_2				-0.460564	0.805232
This-Study		12039	12039-45	Apollo-12	Basalt	Low-Ti-Basalt	Pigeonite-Basalt	Coarse-Grained		Troilite	na	Tr004_3				0.36994	0.816487
This-Study		12039	12039-45	Apollo-12	Basalt	Low-Ti-Basalt	Pigeonite-Basalt	Coarse-Grained		Troilite	na	Tr004_4				1.02991	0.822843
This-Study		12039	12039-45	Apollo-12	Basalt	Low-Ti-Basalt	Pigeonite-Basalt	Coarse-Grained		Troilite	na	Tr003				1.02327	0.833162
This-Study		15475	15475-17	Apollo-15	Basalt	Quartz-Norm-Basalt	Pigeonite-Basalt	Porphyritic		Troilite	na	Tr005_1	With-Ap			-0.180129	0.942635
This-Study		15475	15475-17	Apollo-15	Basalt	Quartz-Norm-Basalt	Pigeonite-Basalt	Porphyritic		Troilite	na	Tr005_2	With-Ap			0.778837	0.944746
This-Study		15475	15475-17	Apollo-15	Basalt	Quartz-Norm-Basalt	Pigeonite-Basalt	Porphyritic		Troilite	na	Tr004_1	With-Ap			0.383707	0.944746
This-Study		15475	15475-17	Apollo-15	Basalt	Quartz-Norm-Basalt	Pigeonite-Basalt	Porphyritic		Troilite	na	Tr004_2	With-Ap			0.716682	0.947935
This-Study		15475	15475-17	Apollo-15	Basalt	Quartz-Norm-Basalt	Pigeonite-Basalt	Porphyritic		Troilite	na	Tr004_3	With-Ap			0.403686	0.951151
This-Study		15016	15016-7	Apollo-15	Basalt	Olivine-Norm-Basalt	Olivine-Norm-Basalt	Medium-Grained		Troilite	na	TR006_1	Large-Including-Ap			0.800202	1.19021
This-Study		15016	15016-7	Apollo-15	Basalt	Olivine-Norm-Basalt	Olivine-Norm-Basalt	Medium-Grained		Troilite	na	TR006_2	Large-Including-Ap			0.145757	1.18853
This-Study		15016	15016-7	Apollo-15	Basalt	Olivine-Norm-Basalt	Olivine-Norm-Basalt	Medium-Grained		Troilite	na	TR006_3	Large-Including-Ap			0.47298	1.18522
This-Study		15016	15016-7	Apollo-15	Basalt	Olivine-Norm-Basalt	Olivine-Norm-Basalt	Medium-Grained		Troilite	na	Tr005	With-Ap			0.702258	1.19189
This-Study		15065	15065-85	Apollo-15	Basalt	Quartz-Norm-Basalt	Gabbroic-Basalt	Coarse-Grained		Troilite	na	Tr002b				-0.156979	1.1877
This-Study		15065	15065-85	Apollo-15	Basalt	Quartz-Norm-Basalt	Gabbroic-Basalt	Coarse-Grained		Troilite	na	Tr003a2_1				-0.0901991	1.18853
This-Study		15065	15065-85	Apollo-15	Basalt	Quartz-Norm-Basalt	Gabbroic-Basalt	Coarse-Grained		Troilite	na	Tr003a2_2				0.757908	1.19274
This-Study		15065	15065-85	Apollo-15	Basalt	Quartz-Norm-Basalt	Gabbroic-Basalt	Coarse-Grained		Troilite	na	Tr004	With-Ap			0.272639	1.19359
Liu-et-al	2022	CE-5	CE-5	CE-5	Basalt	Basalt	Basalt	Soil	Soil	Troilite	na	406-010-19-1	Inclusion			0.9	0.6
Liu-et-al	2022	CE-5	CE-5	CE-5	Basalt	Basalt	Basalt	Soil	Soil	Troilite	na	406-015-42-1	Inclusion			2	0.6
Liu-et-al	2022	CE-5	CE-5	CE-5	Basalt	Basalt	Basalt	Soil	Soil	Troilite	na	406-015-45-1	Inclusion			1.4	0.6
Liu-et-al	2022	CE-5	CE-5	CE-5	Basalt	Basalt	Basalt	Soil	Soil	Troilite	na	406-010-01-1-1	Mesostasis			-1.6	0.6
Liu-et-al	2022	CE-5	CE-5	CE-5	Basalt	Basalt	Basalt	Soil	Soil	Troilite	na	406-010-01-2-1	Mesostasis			-1	0.6
Liu-et-al	2022	CE-5	CE-5	CE-5	Basalt	Basalt	Basalt	Soil	Soil	Troilite	na	406-010-16-1	Mesostasis			0.3	0.6
Liu-et-al	2022	CE-5	CE-5	CE-5	Basalt	Basalt	Basalt	Soil	Soil	Troilite	na	406-010-23-1	Mesostasis			1.3	0.6
Liu-et-al	2022	CE-5	CE-5	CE-5	Basalt	Basalt	Basalt	Soil	Soil	Troilite	na	406-010-24-1	Mesostasis			-1	0.6
Liu-et-al	2022	CE-5	CE-5	CE-5	Basalt	Basalt	Basalt	Soil	Soil	Troilite	na	406-015-14-1-1	Matrix-Large			1.5	0.6
Liu-et-al	2022	CE-5	CE-5	CE-5	Basalt	Basalt	Basalt	Soil	Soil	Troilite	na	406-015-14-1-2	Matrix-Large			-1.1	0.6
Liu-et-al	2022	CE-5	CE-5	CE-5	Basalt	Basalt	Basalt	Soil	Soil	Troilite	na	406-015-14-1-3	Matrix-Large			0.1	0.6
Liu-et-al	2022	CE-5	CE-5	CE-5	Basalt	Basalt	Basalt	Soil	Soil	Troilite	na	406-015-14-1-4	Matrix-Large			0.7	0.6
Liu-et-al	2022	CE-5	CE-5	CE-5	Basalt	Basalt	Basalt	Soil	Soil	Troilite	na	406-015-14-1-5	Matrix-Large			1	0.6
Liu-et-al	2022	CE-5	CE-5	CE-5	Basalt	Basalt	Basalt	Soil	Soil	Troilite	na	406-015-14-1-6	Matrix-Large			1.4	0.6
Liu-et-al	2022	CE-5	CE-5	CE-5	Basalt	Basalt	Basalt	Soil	Soil	Troilite	na	406-015-14-2-1	Mesostasis			0	0.6
Liu-et-al	2022	CE-5	CE-5	CE-5	Basalt	Basalt	Basalt	Soil	Soil	Troilite	na	406-015-46-1	Mesostasis			0.4	0.6
Liu-et-al	2022	CE-5	CE-5	CE-5	Basalt	Basalt	Basalt	Soil	Soil	Troilite	na	406-015-46-2	Mesostasis			-0.1	0.6
Liu-et-al	2022	CE-5	CE-5	CE-5	Basalt	Basalt	Basalt	Soil	Soil	Troilite	na	103-020-04-1	Mesostasis			0.382035	0.6
Liu-et-al	2022	CE-5	CE-5	CE-5	Basalt	Basalt	Basalt	Soil	Soil	Troilite	na	103-020-11-1	Mesostasis			-0.0041624	0.6
Liu-et-al	2022	CE-5	CE-5	CE-5	Basalt	Basalt	Basalt	Soil	Soil	Troilite	na	103-020-17-1	Mesostasis			-0.894687	0.6
Liu-et-al	2022	CE-5	CE-5	CE-5	Basalt	Basalt	Basalt	Soil	Soil	Troilite	na	103-020-21-1	Mesostasis			0.0276421	0.6
Liu-et-al	2022	CE-5	CE-5	CE-5	Basalt	Basalt	Basalt	Soil	Soil	Troilite	na	103-020-21-2	Mesostasis			-0.424436	0.6
Liu-et-al	2022	CE-5	CE-5	CE-5	Basalt	Basalt	Basalt	Soil	Soil	Troilite	na	103-020-21-3	Mesostasis			0.091251	0.6
Liu-et-al	2022	CE-5	CE-5	CE-5	Basalt	Basalt	Basalt	Soil	Soil	Troilite	na	406-037-03-1-1	Matrix-Large			1.22258	0.6
Liu-et-al	2022	CE-5	CE-5	CE-5	Basalt	Basalt	Basalt	Soil	Soil	Troilite	na	406-037-03-1-2	Matrix-Large			1.09082	0.6
Liu-et-al	2022	CE-5	CE-5	CE-5	Basalt	Basalt	Basalt	Soil	Soil	Troilite	na	406-037-03-1-3	Matrix-Large			1.81324	0.6
Liu-et-al	2022	CE-5	CE-5	CE-5	Basalt	Basalt	Basalt	Soil	Soil	Troilite	na	406-037-03-1-4	Matrix-Large			0.92271	0.6
Liu-et-al	2022	CE-5	CE-5	CE-5	Basalt	Basalt	Basalt	Soil	Soil	Troilite	na	406-037-03-1-5	Matrix-Large			1.53835	0.6
Liu-et-al	2022	CE-5	CE-5	CE-5	Basalt	Basalt	Basalt	Soil	Soil	Troilite	na	406-037-03-1-6	Matrix-Large			1.68147	0.6
Liu-et-al	2022	CE-5	CE-5	CE-5	Basalt	Basalt	Basalt	Soil	Soil	Troilite	na	406-037-03-2-1	Matrix-Large			0.825025	0.6
Liu-et-al	2022	CE-5	CE-5	CE-5	Basalt	Basalt	Basalt	Soil	Soil	Troilite	na	406-010-13-1	In-Agglutinates			0.534242	0.6
Liu-et-al	2022	CE-5	CE-5	CE-5	Basalt	Basalt	Basalt	Soil	Soil	Troilite	na	406-015-51-1	In-Agglutinates			-0.276772	0.6
Li-et-al	2025	CE-6	CE-6	CE-6	Basalt	Basalt	Basalt	Soil	Soil	Troilite	na	2-14-1	Mesostasis			1.37	0.29
Li-et-al	2025	CE-6	CE-6	CE-6	Basalt	Basalt	Basalt	Soil	Soil	Troilite	na	2-14-2	Mesostasis			1.07	0.25
Li-et-al	2025	CE-6	CE-6	CE-6	Basalt	Basalt	Basalt	Soil	Soil	Troilite	na	4-32-1	Mesostasis			0.41	0.27
Li-et-al	2025	CE-6	CE-6	CE-6	Basalt	Basalt	Basalt	Soil	Soil	Troilite	na	4-53-1	Mesostasis			0.77	0.32
Li-et-al	2025	CE-6	CE-6	CE-6	Basalt	Basalt	Basalt	Soil	Soil	Troilite	na	7-86-1	matrix			0.83	0.25
Li-et-al	2025	CE-6	CE-6	CE-6	Basalt	Basalt	Basalt	Soil	Soil	Troilite	na	7-86-2	matrix			0.83	0.36
Li-et-al	2025	CE-6	CE-6	CE-6	Basalt	Basalt	Basalt	Soil	Soil	Troilite	na	7-140-1	Mesostasis			0.48	0.36
Li-et-al	2025	CE-6	CE-6	CE-6	Basalt	Basalt	Basalt	Soil	Soil	Troilite	na	5-63-1	Mesostasis			1.07	0.15
Li-et-al	2025	CE-6	CE-6	CE-6	Basalt	Basalt	Basalt	Soil	Soil	Troilite	na	5-67-1	matrix			1.52	0.37
Li-et-al	2025	CE-6	CE-6	CE-6	Basalt	Basalt	Basalt	Soil	Soil	Troilite	na	5-67-2	matrix			0.81	0.65
Li-et-al	2025	CE-6	CE-6	CE-6	Basalt	Basalt	Basalt	Soil	Soil	Troilite	na	5-70-1	Mesostasis			1.22	0.18
Li-et-al	2025	CE-6	CE-6	CE-6	Basalt	Basalt	Basalt	Soil	Soil	Troilite	na	2001-04-01	Mesostasis			0.41	0.69
Li-et-al	2025	CE-6	CE-6	CE-6	Basalt	Basalt	Basalt	Soil	Soil	Troilite	na	2002-04-01	Mesostasis			0.65	0.36
Li-et-al	2025	CE-6	CE-6	CE-6	Basalt	Basalt	Basalt	Soil	Soil	Troilite	na	1-20-1	Mesostasis			0.7	0.35
Li-et-al	2025	CE-6	CE-6	CE-6	Basalt	Basalt	Basalt	Soil	Soil	Troilite	na	1-20-2	Mesostasis			0.3	0.51
Li-et-al	2025	CE-6	CE-6	CE-6	Basalt	Basalt	Basalt	Soil	Soil	Troilite	na	1-41-1	Mesostasis			1.19	0.24
Li-et-al	2025	CE-6	CE-6	CE-6	Basalt	Basalt	Basalt	Soil	Soil	Troilite	na	1-155-1	Mesostasis			0.47	0.2
Li-et-al	2025	CE-6	CE-6	CE-6	Mg-suite	Mg-suite	Mg-suite	Soil	Soil	Troilite	na	4-28-1	in plagioclase			1.14	0.6
Li-et-al	2025	CE-6	CE-6	CE-6	FAN	FAN	FAN	Soil	Soil	Troilite	na	5-48-1	in plagioclase			0.94	0.62
Li-et-al	2025	CE-6	CE-6	CE-6	Breccia	Breccia	Breccia	Soil	Soil	Troilite	na	2-13-1	Mesostasis or large in matrix			0.47	0.37
Li-et-al	2025	CE-6	CE-6	CE-6	Breccia	Breccia	Breccia	Soil	Soil	Troilite	na	2-19-1	Mesostasis or large in matrix			1.86	0.5
Li-et-al	2025	CE-6	CE-6	CE-6	Breccia	Breccia	Breccia	Soil	Soil	Troilite	na	2-19-2	Mesostasis or large in matrix			2.19	0.48
Li-et-al	2025	CE-6	CE-6	CE-6	Breccia	Breccia	Breccia	Soil	Soil	Troilite	na	2-19-3	Mesostasis or large in matrix			1.7	0.91
Li-et-al	2025	CE-6	CE-6	CE-6	Breccia	Breccia	Breccia	Soil	Soil	Troilite	na	4-42-1	Mesostasis or large in matrix			0.3	0.4
Li-et-al	2025	CE-6	CE-6	CE-6	Breccia	Breccia	Breccia	Soil	Soil	Troilite	na	7-49-1	Mesostasis or large in matrix			0.72	0.39
Li-et-al	2025	CE-6	CE-6	CE-6	Breccia	Breccia	Breccia	Soil	Soil	Troilite	na	7-81-1	large in matrix			0.86	0.27
Li-et-al	2025	CE-6	CE-6	CE-6	Breccia	Breccia	Breccia	Soil	Soil	Troilite	na	7-84-1	large in matrix			1.85	0.25
Li-et-al	2025	CE-6	CE-6	CE-6	Breccia	Breccia	Breccia	Soil	Soil	Troilite	na	7-93-1	Mesostasis or large in matrix			1.13	0.34
Li-et-al	2025	CE-6	CE-6	CE-6	Breccia	Breccia	Breccia	Soil	Soil	Troilite	na	1-21-1	Mesostasis or large in matrix			1.15	0.18
Li-et-al	2025	CE-6	CE-6	CE-6	Breccia	Breccia	Breccia	Soil	Soil	Troilite	na	1-36-1	Mesostasis or large in matrix			0.89	0.32
Li-et-al	2025	CE-6	CE-6	CE-6	Breccia	Breccia	Breccia	Soil	Soil	Troilite	na	1-36-2	Mesostasis or large in matrix			1.24	0.33
Li-et-al	2025	CE-6	CE-6	CE-6	Breccia	Breccia	Breccia	Soil	Soil	Troilite	na	1-132-1	Mesostasis or large in matrix			0.98	0.16
Li-et-al	2025	CE-6	CE-6	CE-6	Breccia	Breccia	Breccia	Soil	Soil	Troilite	na	1-167-1	Mesostasis or large in matrix			2.04	0.4
Li-et-al	2025	NWA	NWA-14526	Meteorite	Basalt	Low-Ti-Basalt	Low-Ti-Basalt	Low-Ti-Basalt	Low-Ti-Basalt	Troilite	na	14526-2	Mesostasis			1.1	0.15
Li-et-al	2025	NWA	NWA-14526	Meteorite	Basalt	Low-Ti-Basalt	Low-Ti-Basalt	Low-Ti-Basalt	Low-Ti-Basalt	Troilite	na	14526-3	Mesostasis			0.84	0.14
Li-et-al	2025	NWA	NWA-14526	Meteorite	Basalt	Low-Ti-Basalt	Low-Ti-Basalt	Low-Ti-Basalt	Low-Ti-Basalt	Troilite	na	14526-4	Mesostasis			0.62	0.12
Li-et-al	2025	NWA	NWA-14526	Meteorite	Basalt	Low-Ti-Basalt	Low-Ti-Basalt	Low-Ti-Basalt	Low-Ti-Basalt	Troilite	na	14526-5	Mesostasis			0.94	0.19
Li-et-al	2025	NWA	NWA-14526	Meteorite	Basalt	Low-Ti-Basalt	Low-Ti-Basalt	Low-Ti-Basalt	Low-Ti-Basalt	Troilite	na	14526-5	Mesostasis			0.94	0.2
Li-et-al	2025	NWA	NWA-14526	Meteorite	Basalt	Low-Ti-Basalt	Low-Ti-Basalt	Low-Ti-Basalt	Low-Ti-Basalt	Troilite	na	14526-6	Mesostasis			0.92	0.14
Li-et-al	2025	NWA	NWA-14526	Meteorite	Basalt	Low-Ti-Basalt	Low-Ti-Basalt	Low-Ti-Basalt	Low-Ti-Basalt	Troilite	na	14526-7	Mesostasis			1.3	0.14
Li-et-al	2025	NWA	NWA-14526	Meteorite	Basalt	Low-Ti-Basalt	Low-Ti-Basalt	Low-Ti-Basalt	Low-Ti-Basalt	Troilite	na	14526-8	Mesostasis			0.49	0.15
Li-et-al	2025	NWA	NWA-14526	Meteorite	Basalt	Low-Ti-Basalt	Low-Ti-Basalt	Low-Ti-Basalt	Low-Ti-Basalt	Troilite	na	14526-9	Mesostasis			0.91	0.18
Li-et-al	2025	NWA	NWA-14526	Meteorite	Basalt	Low-Ti-Basalt	Low-Ti-Basalt	Low-Ti-Basalt	Low-Ti-Basalt	Troilite	na	14526-10	Mesostasis			0.32	0.17
Li-et-al	2025	NWA	NWA-12008	Meteorite	Basalt	Low-Ti-Basalt	Low-Ti-Basalt	Low-Ti-Basalt	Low-Ti-Basalt	Troilite	na	12008-1	Mesostasis			1.17	0.63
Li-et-al	2025	NWA	NWA-12008	Meteorite	Basalt	Low-Ti-Basalt	Low-Ti-Basalt	Low-Ti-Basalt	Low-Ti-Basalt	Troilite	na	12008-2	Mesostasis			0.01	0.38
Li-et-al	2025	NWA	NWA-12008	Meteorite	Basalt	Low-Ti-Basalt	Low-Ti-Basalt	Low-Ti-Basalt	Low-Ti-Basalt	Troilite	na	12008-3	Mesostasis			0.43	0.47
Li-et-al	2025	NWA	NWA-12008	Meteorite	Basalt	Low-Ti-Basalt	Low-Ti-Basalt	Low-Ti-Basalt	Low-Ti-Basalt	Troilite	na	12008-4	Mesostasis			-0.09	0.31
Li-et-al	2025	NWA	NWA-12008	Meteorite	Basalt	Low-Ti-Basalt	Low-Ti-Basalt	Low-Ti-Basalt	Low-Ti-Basalt	Troilite	na	12008-5	Mesostasis			0.27	0.47
Li-et-al	2025	NWA	NWA-12008	Meteorite	Basalt	Low-Ti-Basalt	Low-Ti-Basalt	Low-Ti-Basalt	Low-Ti-Basalt	Troilite	na	12008-7	Mesostasis			-0.09	0.48
Li-et-al	2025	NWA	NWA-12008	Meteorite	Meteorite	Low-Ti-Basalt	Low-Ti-Basalt	Low-Ti-Basalt	Low-Ti-Basalt	Troilite	na	12008-9	Mesostasis			0.35	0.35
Dottin-et-al	2022	74241	74241-204	Apollo-17	Soil-and-Glass	Soil-and-Glass	Soil-and-Glass	Soil-and-Glass	Soil-and-Glass	Soil-and-Glass	na	0-10				7.29		1268
Dottin-et-al	2022	74241	74241-204	Apollo-17	Soil-and-Glass	Soil-and-Glass	Soil-and-Glass	Soil-and-Glass	Soil-and-Glass	Soil-and-Glass	na	10-20				4.5		1196
Dottin-et-al	2022	74241	74241-204	Apollo-17	Soil-and-Glass	Soil-and-Glass	Soil-and-Glass	Soil-and-Glass	Soil-and-Glass	Soil-and-Glass	na	20-45				3.22		726
Dottin-et-al	2022	74241	74241-204	Apollo-17	Soil-and-Glass	Soil-and-Glass	Soil-and-Glass	Soil-and-Glass	Soil-and-Glass	Soil-and-Glass	na	45-75				2.72		804
Dottin-et-al	2022	74241	74241-204	Apollo-17	Soil-and-Glass	Soil-and-Glass	Soil-and-Glass	Soil-and-Glass	Soil-and-Glass	Soil-and-Glass	na	75-90				3.29		762
Dottin-et-al	2022	74241	74241-204	Apollo-17	Soil-and-Glass	Soil-and-Glass	Soil-and-Glass	Soil-and-Glass	Soil-and-Glass	Soil-and-Glass	na	90-150				2.49		864
Dottin-et-al	2022	74241	74241-204	Apollo-17	Soil-and-Glass	Soil-and-Glass	Soil-and-Glass	Soil-and-Glass	Soil-and-Glass	Soil-and-Glass	na	150-250				2.15		834
Dottin-et-al	2022	74241	74241-204	Apollo-17	Soil-and-Glass	Soil-and-Glass	Soil-and-Glass	Soil-and-Glass	Soil-and-Glass	Soil-and-Glass	na	250-500				1.81		976
Dottin-et-al	2022	74241	74241-204	Apollo-17	Soil-and-Glass	Soil-and-Glass	Soil-and-Glass	Soil-and-Glass	Soil-and-Glass	Soil-and-Glass	na	500-1000				1.59		1157
Dottin-et-al	2022	75081	75081-690	Apollo-17	Soil-and-Glass	Soil-and-Glass	Soil-and-Glass	Soil-and-Glass	Soil-and-Glass	Soil-and-Glass	na	0-10				9.91		1725
Dottin-et-al	2022	75081	75081-690	Apollo-17	Soil-and-Glass	Soil-and-Glass	Soil-and-Glass	Soil-and-Glass	Soil-and-Glass	Soil-and-Glass	na	10-20				6.26		1724
Dottin-et-al	2022	75081	75081-690	Apollo-17	Soil-and-Glass	Soil-and-Glass	Soil-and-Glass	Soil-and-Glass	Soil-and-Glass	Soil-and-Glass	na	20-45				6.01		1055
Dottin-et-al	2022	75081	75081-690	Apollo-17	Soil-and-Glass	Soil-and-Glass	Soil-and-Glass	Soil-and-Glass	Soil-and-Glass	Soil-and-Glass	na	45-75				4.6		815
Dottin-et-al	2022	75081	75081-690	Apollo-17	Soil-and-Glass	Soil-and-Glass	Soil-and-Glass	Soil-and-Glass	Soil-and-Glass	Soil-and-Glass	na	75-90				4.12		549
Dottin-et-al	2022	75081	75081-690	Apollo-17	Soil-and-Glass	Soil-and-Glass	Soil-and-Glass	Soil-and-Glass	Soil-and-Glass	Soil-and-Glass	na	90-150				3.63		722
Dottin-et-al	2022	75081	75081-690	Apollo-17	Soil-and-Glass	Soil-and-Glass	Soil-and-Glass	Soil-and-Glass	Soil-and-Glass	Soil-and-Glass	na	150-250				2.76		856
Dottin-et-al	2022	75081	75081-690	Apollo-17	Soil-and-Glass	Soil-and-Glass	Soil-and-Glass	Soil-and-Glass	Soil-and-Glass	Soil-and-Glass	na	250-500				2.36		922
Dottin-et-al	2022	75081	75081-690	Apollo-17	Soil-and-Glass	Soil-and-Glass	Soil-and-Glass	Soil-and-Glass	Soil-and-Glass	Soil-and-Glass	na	500-1000				1.69		1130
Saal-and-Hauri	2021	15426	15426-27	Apollo-15	Glass-Beads	Low-Ti-Glass	Low-Ti-Glass	Glass beads	Glass beads	Glass beads	na	B5				-6	1.1	160.672
Saal-and-Hauri	2021	15426	15426-27	Apollo-15	Glass-Beads	Low-Ti-Glass	Low-Ti-Glass	Glass beads	Glass beads	Glass beads	na	B19				-4.9	1	237.806
Saal-and-Hauri	2021	15426	15426-27	Apollo-15	Glass-Beads	Low-Ti-Glass	Low-Ti-Glass	Glass beads	Glass beads	Glass beads	na	B24				-8.3	1.4	129.348
Saal-and-Hauri	2021	15426	15426-27	Apollo-15	Glass-Beads	Low-Ti-Glass	Low-Ti-Glass	Glass beads	Glass beads	Glass beads	na	B26				-8.8	1.3	171.301
Saal-and-Hauri	2021	15426	15426-27	Apollo-15	Glass-Beads	Low-Ti-Glass	Low-Ti-Glass	Glass beads	Glass beads	Glass beads	na	B31				-5.1	0.9	210.983
Saal-and-Hauri	2021	15426	15426-27	Apollo-15	Glass-Beads	Low-Ti-Glass	Low-Ti-Glass	Glass beads	Glass beads	Glass beads	na	C2				-8.3	1.4	127.681
Saal-and-Hauri	2021	15426	15426-27	Apollo-15	Glass-Beads	Low-Ti-Glass	Low-Ti-Glass	Glass beads	Glass beads	Glass beads	na	C3				-6.79	1.3	169.964
Saal-and-Hauri	2021	15426	15426-27	Apollo-15	Glass-Beads	Low-Ti-Glass	Low-Ti-Glass	Glass beads	Glass beads	Glass beads	na	C6				-7.53	1.5	131.401
Saal-and-Hauri	2021	15426	15426-27	Apollo-15	Glass-Beads	Low-Ti-Glass	Low-Ti-Glass	Glass beads	Glass beads	Glass beads	na	C7				-7.5	1.3	99.7714
Saal-and-Hauri	2021	15426	15426-27	Apollo-15	Glass-Beads	Low-Ti-Glass	Low-Ti-Glass	Glass beads	Glass beads	Glass beads	na	C10				-12.3	2.1	67.3661
Saal-and-Hauri	2021	15426	15426-27	Apollo-15	Glass-Beads	Low-Ti-Glass	Low-Ti-Glass	Glass beads	Glass beads	Glass beads	na	C11				-9.4	2.2	79.0091
Saal-and-Hauri	2021	15426	15426-27	Apollo-15	Glass-Beads	Low-Ti-Glass	Low-Ti-Glass	Glass beads	Glass beads	Glass beads	na	C12				-12.76	2	93.9334
Saal-and-Hauri	2021	15426	15426-27	Apollo-15	Glass-Beads	Low-Ti-Glass	Low-Ti-Glass	Glass beads	Glass beads	Glass beads	na	C13				-12.84	2.3	98.1287
Saal-and-Hauri	2021	15426	15426-27	Apollo-15	Glass-Beads	Low-Ti-Glass	Low-Ti-Glass	Glass beads	Glass beads	Glass beads	na	C16				-14.02	2.3	89.2308
Saal-and-Hauri	2021	15426	15426-27	Apollo-15	Glass-Beads	Low-Ti-Glass	Low-Ti-Glass	Glass beads	Glass beads	Glass beads	na	C17				-14.2	2.3	93.3375
Saal-and-Hauri	2021	15426	15426-27	Apollo-15	Glass-Beads	Low-Ti-Glass	Low-Ti-Glass	Glass beads	Glass beads	Glass beads	na	C20				-12.53	2	118.405
Saal-and-Hauri	2021	15426	15426-27	Apollo-15	Glass-Beads	Low-Ti-Glass	Low-Ti-Glass	Glass beads	Glass beads	Glass beads	na	C22				-9.42	1.8	108
Saal-and-Hauri	2021	15426	15426-27	Apollo-15	Glass-Beads	Low-Ti-Glass	Low-Ti-Glass	Glass beads	Glass beads	Glass beads	na	C24				-8.94	1.8	139.301
Saal-and-Hauri	2021	15426	15426-27	Apollo-15	Glass-Beads	Low-Ti-Glass	Low-Ti-Glass	Glass beads	Glass beads	Glass beads	na	C27				-11.27	1.7	121.964
Saal-and-Hauri	2021	15426	15426-27	Apollo-15	Glass-Beads	Low-Ti-Glass	Low-Ti-Glass	Glass beads	Glass beads	Glass beads	na	C29				-14.03	2.2	97.0255
Saal-and-Hauri	2021	15426	15426-27	Apollo-15	Glass-Beads	Low-Ti-Glass	Low-Ti-Glass	Glass beads	Glass beads	Glass beads	na	C32				-9.87	1.9	134.775
Saal-and-Hauri	2021	15426	15426-27	Apollo-15	Glass-Beads	Low-Ti-Glass	Low-Ti-Glass	Glass beads	Glass beads	Glass beads	na	C33				-10.7	1.8	114.242
Saal-and-Hauri	2021	15426	15426-27	Apollo-15	Glass-Beads	Low-Ti-Glass	Low-Ti-Glass	Glass beads	Glass beads	Glass beads	na	C34				-10	1.8	119.041
Saal-and-Hauri	2021	15426	15426-27	Apollo-15	Glass-Beads	Low-Ti-Glass	Low-Ti-Glass	Glass beads	Glass beads	Glass beads	na	D36				-12.91	3.4	88.3048
Saal-and-Hauri	2021	15426	15426-27	Apollo-15	Glass-Beads	Low-Ti-Glass	Low-Ti-Glass	Glass beads	Glass beads	Glass beads	na	D51				-10.52	2.8	104.216
Saal-and-Hauri	2021	15426	15426-27	Apollo-15	Glass-Beads	Low-Ti-Glass	Low-Ti-Glass	Glass beads	Glass beads	Glass beads	na	D56				-4.86	1.6	363.802
Saal-and-Hauri	2021	15426	15426-27	Apollo-15	Glass-Beads	Low-Ti-Glass	Low-Ti-Glass	Glass beads	Glass beads	Glass beads	na	D68				-9.89	2.9	109.684
Saal-and-Hauri	2021	15426	15426-27	Apollo-15	Glass-Beads	Low-Ti-Glass	Low-Ti-Glass	Glass beads	Glass beads	Glass beads	na	D75				-7.78	2.3	163.595
Saal-and-Hauri	2021	15426	15426-27	Apollo-15	Glass-Beads	Low-Ti-Glass	Low-Ti-Glass	Glass beads	Glass beads	Glass beads	na	D77				-6.11	2.5	226.854
Saal-and-Hauri	2021	15426	15426	Apollo-15	Glass-Beads	Glass beads	Glass beads	Glass beads	Glass beads	Glass beads	na	15426L-3				-6.1	1.1	180.491
Saal-and-Hauri	2021	15426	15426	Apollo-15	Glass-Beads	Glass beads	Glass beads	Glass beads	Glass beads	Glass beads	na	15426L-8				-7.8	1	221.992
Saal-and-Hauri	2021	15426	15426	Apollo-15	Glass-Beads	Glass beads	Glass beads	Glass beads	Glass beads	Glass beads	na	15426L-11				-9.5	1.2	121.332
Saal-and-Hauri	2021	15426	15426	Apollo-15	Glass-Beads	Glass beads	Glass beads	Glass beads	Glass beads	Glass beads	na	15426L-18				-10.8	1.7	73.9107
Saal-and-Hauri	2021	15426	15426	Apollo-15	Glass-Beads	Glass beads	Glass beads	Glass beads	Glass beads	Glass beads	na	15426L-19				-8.1	1.2	143.645
Saal-and-Hauri	2021	15426	15426	Apollo-15	Glass-Beads	Glass beads	Glass beads	Glass beads	Glass beads	Glass beads	na	15426L-22				-7.4	1.1	228.663
Saal-and-Hauri	2021	15426	15426	Apollo-15	Glass-Beads	Glass beads	Glass beads	Glass beads	Glass beads	Glass beads	na	15426L-25				-7.2	1	230.825
Saal-and-Hauri	2021	15426	15426	Apollo-15	Glass-Beads	Glass beads	Glass beads	Glass beads	Glass beads	Glass beads	na	15426L-26				-7.3	1.1	167.693
Saal-and-Hauri	2021	15426	15426	Apollo-15	Glass-Beads	Glass beads	Glass beads	Glass beads	Glass beads	Glass beads	na	15426L-31				-7.4	1.1	165.269
Saal-and-Hauri	2021	15426	15426	Apollo-15	Glass-Beads	Glass beads	Glass beads	Glass beads	Glass beads	Glass beads	na	15426L-33				-9.2	1.4	96.4165
Saal-and-Hauri	2021	15426	15426	Apollo-15	Glass-Beads	Glass beads	Glass beads	Glass beads	Glass beads	Glass beads	na	15426L-34				-5.2	1	143.466
Saal-and-Hauri	2021	15426	15426	Apollo-15	Glass-Beads	Glass beads	Glass beads	Glass beads	Glass beads	Glass beads	na	15426L-36				-5.2	1	227.375
Saal-and-Hauri	2021	15426	15426	Apollo-15	Glass-Beads	Glass beads	Glass beads	Glass beads	Glass beads	Glass beads	na	15426L-42				-4.8	1	232.911
Saal-and-Hauri	2021	15426	15426-27	Apollo-15	Glass-Beads	Low-Ti-Glass	Low-Ti-Glass	Glass beads	Glass beads	Glass beads	na	B21				-1.6	0.8	523.456
Saal-and-Hauri	2021	15426	15426-27	Apollo-15	Glass-Beads	Low-Ti-Glass	Low-Ti-Glass	Glass beads	Glass beads	Glass beads	na	D3				-3.11	2	409.04
Saal-and-Hauri	2021	15426	15426-27	Apollo-15	Glass-Beads	Low-Ti-Glass	Low-Ti-Glass	Glass beads	Glass beads	Glass beads	na	D16				-3.08	1.4	582.207
Saal-and-Hauri	2021	15426	15426-27	Apollo-15	Glass-Beads	Low-Ti-Glass	Low-Ti-Glass	Glass beads	Glass beads	Glass beads	na	D17				-1.48	1.3	478.806
Saal-and-Hauri	2021	15426	15426-27	Apollo-15	Glass-Beads	Low-Ti-Glass	Low-Ti-Glass	Glass beads	Glass beads	Glass beads	na	D21				-4.05	1.6	289.035
Saal-and-Hauri	2021	15426	15426-27	Apollo-15	Glass-Beads	Low-Ti-Glass	Low-Ti-Glass	Glass beads	Glass beads	Glass beads	na	D27				-4.42	1.4	434.606
Saal-and-Hauri	2021	15426	15426-27	Apollo-15	Glass-Beads	Low-Ti-Glass	Low-Ti-Glass	Glass beads	Glass beads	Glass beads	na	D34				-4.37	1.5	341.617
Saal-and-Hauri	2021	15426	15426-27	Apollo-15	Glass-Beads	Low-Ti-Glass	Low-Ti-Glass	Glass beads	Glass beads	Glass beads	na	D45				-3.79	1.5	301.903
Saal-and-Hauri	2021	15426	15426-27	Apollo-15	Glass-Beads	Low-Ti-Glass	Low-Ti-Glass	Glass beads	Glass beads	Glass beads	na	D50				-0.78	1.4	475.641
Saal-and-Hauri	2021	15426	15426-27	Apollo-15	Glass-Beads	Low-Ti-Glass	Low-Ti-Glass	Glass beads	Glass beads	Glass beads	na	D52				-2.42	1.5	289.373
Saal-and-Hauri	2021	15426	15426-27	Apollo-15	Glass-Beads	Low-Ti-Glass	Low-Ti-Glass	Glass beads	Glass beads	Glass beads	na	D58				-0.27	1.1	816.346
Saal-and-Hauri	2021	15426	15426-27	Apollo-15	Glass-Beads	Low-Ti-Glass	Low-Ti-Glass	Glass beads	Glass beads	Glass beads	na	D72				-3.71	1.4	598.714
Saal-and-Hauri	2021	15426	15426-27	Apollo-15	Glass-Beads	Low-Ti-Glass	Low-Ti-Glass	Glass beads	Glass beads	Glass beads	na	D85				-3.49	1.5	465.721
Saal-and-Hauri	2021	15426	15426-27	Apollo-15	Glass-Beads	Low-Ti-Glass	Low-Ti-Glass	Glass beads	Glass beads	Glass beads	na	D90				-4.7	1.5	524.833
Saal-and-Hauri	2021	74220	74220	Apollo-17	Glass-Beads	High-Ti-Glass	High-Ti-Glass	Glass beads	Glass beads	Glass beads	na	74220L-7				-0.1	0.8	326.514
Saal-and-Hauri	2021	74220	74220	Apollo-17	Glass-Beads	High-Ti-Glass	High-Ti-Glass	Glass beads	Glass beads	Glass beads	na	74220L-13				1.2	0.7	406.995
Saal-and-Hauri	2021	74220	74220	Apollo-17	Glass-Beads	High-Ti-Glass	High-Ti-Glass	Glass beads	Glass beads	Glass beads	na	74220L-15				-1.2	0.8	390.093
Saal-and-Hauri	2021	74220	74220	Apollo-17	Glass-Beads	High-Ti-Glass	High-Ti-Glass	Glass beads	Glass beads	Glass beads	na	74220L-16				-0.4	0.8	337.205
Saal-and-Hauri	2021	74220	74220	Apollo-17	Glass-Beads	High-Ti-Glass	High-Ti-Glass	Glass beads	Glass beads	Glass beads	na	74220L-25				-1.8	0.8	282.693
Saal-and-Hauri	2021	74220	74220	Apollo-17	Glass-Beads	High-Ti-Glass	High-Ti-Glass	Glass beads	Glass beads	Glass beads	na	74220L-34				0	0.8	334.637
Saal-and-Hauri	2021	74220	74220	Apollo-17	Glass-Beads	High-Ti-Glass	High-Ti-Glass	Glass beads	Glass beads	Glass beads	na	74220L-38				-0.8	0.8	344.496
Saal-and-Hauri	2021	74220	74220	Apollo-17	Glass-Beads	High-Ti-Glass	High-Ti-Glass	Glass beads	Glass beads	Glass beads	na	74220L-43				1.3	0.8	400
Saal-and-Hauri	2021	74220	High-Ti glasses	Apollo-17	Melt-Inclusion	High-Ti-Glass	High-Ti-Glass	Melt-Inclusion	Glass beads	Melt-Inclusion	na	74220 A2 MI				1.5	0.816254	688.5		2.377		2.377
Saal-and-Hauri	2021	74220	High-Ti glasses	Apollo-17	Melt-Inclusion	High-Ti-Glass	High-Ti-Glass	Melt-Inclusion	Glass beads	Melt-Inclusion	na	74220 A2 Ol
Saal-and-Hauri	2021	74220	High-Ti glasses	Apollo-17	Melt-Inclusion	High-Ti-Glass	High-Ti-Glass	Melt-Inclusion	Glass beads	Melt-Inclusion	na	74220 N8 MI				1.6	0.906714	552.5		1.853		1.853
Saal-and-Hauri	2021	74220	High-Ti glasses	Apollo-17	Melt-Inclusion	High-Ti-Glass	High-Ti-Glass	Melt-Inclusion	Glass beads	Melt-Inclusion	na	74220 N8 MG
Saal-and-Hauri	2021	74220	High-Ti glasses	Apollo-17	Melt-Inclusion	High-Ti-Glass	High-Ti-Glass	Melt-Inclusion	Glass beads	Melt-Inclusion	na	74220 N8 Ol
Saal-and-Hauri	2021	74220	High-Ti glasses	Apollo-17	Melt-Inclusion	High-Ti-Glass	High-Ti-Glass	Melt-Inclusion	Glass beads	Melt-Inclusion	na	74220 N9 MI				-0.3	0.907532	482.9		1.198		1.198
Saal-and-Hauri	2021	74220	High-Ti glasses	Apollo-17	Melt-Inclusion	High-Ti-Glass	High-Ti-Glass	Melt-Inclusion	Glass beads	Melt-Inclusion	na	74220 N9 MG
Saal-and-Hauri	2021	74220	High-Ti glasses	Apollo-17	Melt-Inclusion	High-Ti-Glass	High-Ti-Glass	Melt-Inclusion	Glass beads	Melt-Inclusion	na	74220 N9 Ol
Wang-et-al	2024	CE5C0600YJFM	CE5C0600YJFM	CE-5			Volcanic-Glass			Glass beads	na	IGGCE5-47-26@1				-11.5	2.53062	400.69
Wang-et-al	2024	CE5C0600YJFM	CE5C0600YJFM	CE-5			Volcanic-Glass			Glass beads	na	IGGCE5-47-26@2				-10.28	2.59928	410.89
Wang-et-al	2024	CE5C0600YJFM	CE5C0600YJFM	CE-5			Volcanic-Glass			Glass beads	na	IGGCE5-47-26@3				-10.4	2.40878	504.97
Wang-et-al	2024	CE5C0600YJFM	CE5C0600YJFM	CE-5			Volcanic-Glass			Glass beads	na	IGGCE5-47-26@4				-10.34	2.52347	406.63
Wang-et-al	2024	CE5C0600YJFM	CE5C0600YJFM	CE-5			Volcanic-Glass			Glass beads	na	IGGCE5-47-280@1				-12.35	2.58072	343.16
Wang-et-al	2024	CE5C0600YJFM	CE5C0600YJFM	CE-5			Volcanic-Glass			Glass beads	na	IGGCE5-49-167@1				-10.95	2.42604	521.76
Wang-et-al	2024	CE5C0600YJFM	CE5C0600YJFM	CE-5			Volcanic-Glass			Glass beads	na	IGGCE5-49-167@2				-9.46	2.50511	405.27
Wang-et-al	2024	CE5C0600YJFM	CE5C0600YJFM	CE-5			Impact-Glass			Glass beads	na	IGGCE5-40-15@1				7	9.68723	10.14
Wang-et-al	2024	CE5C0600YJFM	CE5C0600YJFM	CE-5			Impact-Glass			Glass beads	na	IGGCE5-40-15@2				3.51	6.161	27.21
Wang-et-al	2024	CE5C0600YJFM	CE5C0600YJFM	CE-5			Impact-Glass			Glass beads	na	IGGCE5-40-15@3				4.65	7.7629	18.73
Wang-et-al	2024	CE5C0600YJFM	CE5C0600YJFM	CE-5			Impact-Glass			Glass beads	na	IGGCE5-41-28@1				7.81	2.36046	865.3
Wang-et-al	2024	CE5C0600YJFM	CE5C0600YJFM	CE-5			Impact-Glass			Glass beads	na	IGGCE5-44-78@1				2.68	5.37538	26.41
Wang-et-al	2024	CE5C0600YJFM	CE5C0600YJFM	CE-5			Impact-Glass			Glass beads	na	IGGCE5-45-46@2				9.38	2.36981	767.19
Wang-et-al	2024	CE5C0600YJFM	CE5C0600YJFM	CE-5			Impact-Glass			Glass beads	na	IGGCE5-47-80@1				5	3.4749	126.03
Wang-et-al	2024	CE5C0600YJFM	CE5C0600YJFM	CE-5			Impact-Glass			Glass beads	na	IGGCE5-47-152@1				7.75	3.73267	87.73
Wang-et-al	2024	CE5C0600YJFM	CE5C0600YJFM	CE-5			Impact-Glass			Glass beads	na	IGGCE5-47-181@1				4.28	2.38099	2061.61
Wang-et-al	2024	CE5C0600YJFM	CE5C0600YJFM	CE-5			Impact-Glass			Glass beads	na	IGGCE5-47-279@1				8.85	2.34297	638.08
Wang-et-al	2024	CE5C0600YJFM	CE5C0600YJFM	CE-5			Impact-Glass			Glass beads	na	IGGCE5-50-59@1				4.02	2.38644	1017.38
Wang-et-al	2024	CE5C0600YJFM	CE5C0600YJFM	CE-5			Impact-Glass			Glass beads	na	IGGCE5-50-59@2				2.47	2.59461	607.28
Wang-et-al	2024	CE5C0600YJFM	CE5C0600YJFM	CE-5			Impact-Glass			Glass beads	na	IGGCE5-50-59@3				4.88	2.42394	907.64
Wang-et-al	2024	CE5C0600YJFM	CE5C0600YJFM	CE-5			Impact-Glass			Glass beads	na	IGGCE5-50-59@4				6.93	2.75522	490.31
Wang-et-al	2024	CE5C0600YJFM	CE5C0600YJFM	CE-5			Impact-Glass			Glass beads	na	IGGCE5-50-59@5				6.83	2.56984	379.71
Wang-et-al	2024	CE5C0600YJFM	CE5C0600YJFM	CE-5			Impact-Glass			Glass beads	na	IGGCE5-50-59@6				5.19	2.37525	603.78
Wang-et-al	2024	CE5C0600YJFM	CE5C0600YJFM	CE-5			Impact-Glass			Glass beads	na	IGGCE5-38-7@5				4.34	2.31746	2174.59
Wang-et-al	2024	CE5C0600YJFM	CE5C0600YJFM	CE-5			Impact-Glass			Glass beads	na	IGGCE5-44-24@1				30.84	9.36931	8.51
Wang-et-al	2024	CE5C0600YJFM	CE5C0600YJFM	CE-5			Impact-Glass			Glass beads	na	IGGCE5-44-24@2				40.45	11.709	4.1
Wang-et-al	2024	CE5C0600YJFM	CE5C0600YJFM	CE-5			Impact-Glass			Glass beads	na	IGGCE5-44-66@1				7.68	2.61728	743.59
Wang-et-al	2024	CE5C0600YJFM	CE5C0600YJFM	CE-5			Impact-Glass			Glass beads	na	IGGCE5-44-66@2				2.41	2.42061	1082.88
Wang-et-al	2024	CE5C0600YJFM	CE5C0600YJFM	CE-5			Impact-Glass			Glass beads	na	IGGCE5-44-66@3				2.85	2.29018	2248.07
Wang-et-al	2024	CE5C0600YJFM	CE5C0600YJFM	CE-5			Impact-Glass			Glass beads	na	IGGCE5-47-69@1				6.32	3.04733	176.33
Wang-et-al	2024	CE5C0600YJFM	CE5C0600YJFM	CE-5			Impact-Glass			Glass beads	na	IGGCE5-47-286@1				8.86	6.18083	30.44
Wang-et-al	2024	CE5C0600YJFM	CE5C0600YJFM	CE-5			Impact-Glass			Glass beads	na	IGGCE5-49-133@1				7.02	2.94144	222.68
Wang-et-al	2024	CE5C0600YJFM	CE5C0600YJFM	CE-5			Impact-Glass			Glass beads	na	IGGCE5-51-14@1				11.36	2.57703	550.14
Wang-et-al	2024	CE5C0600YJFM	CE5C0600YJFM	CE-5			Impact-Glass			Glass beads	na	IGGCE5-51-65@1				12.49	2.20039	981.11
Wang-et-al	2024	CE5C0600YJFM	CE5C0600YJFM	CE-5			Impact-Glass			Glass beads	na	IGGCE5-51-76@1				10.56	4.17234	21.75
Wang-et-al	2024	CE5C0600YJFM	CE5C0600YJFM	CE-5			Impact-Glass			Glass beads	na	IGGCE5-51-180@1				3.77	2.9873	205.06
Wang-et-al	2024	CE5C0600YJFM	CE5C0600YJFM	CE-5			Impact-Glass			Glass beads	na	IGGCE5-51-180@2				3.92	2.86177	120.4
Wang-et-al	2024	CE5C0600YJFM	CE5C0600YJFM	CE-5			Impact-Glass			Glass beads	na	IGGCE5-51-180@3				4.31	2.36369	259.98
Wang-et-al	2024	CE5C0600YJFM	CE5C0600YJFM	CE-5			Impact-Glass			Glass beads	na	IGGCE5-51-212@1				16.29	5.75629	13.41
Wang-et-al	2024	CE5C0600YJFM	CE5C0600YJFM	CE-5			Impact-Glass			Glass beads	na	IGGCE5-51-261@1				11.47	2.14225	829.18
Wang-et-al	2024	CE5C0600YJFM	CE5C0600YJFM	CE-5			Impact-Glass			Glass beads	na	IGGCE5-51-267@1				10.7	7.08218	7.39
Wang-et-al	2024	CE5C0600YJFM	CE5C0600YJFM	CE-5			Impact-Glass			Glass beads	na	IGGCE5-51-300@1				7.03	5.18808	15.66
Wang-et-al	2024	CE5C0600YJFM	CE5C0600YJFM	CE-5			Impact-Glass			Glass beads	na	IGGCE5-51-314@1				6.04	2.26896	280.38
Wang-et-al	2024	CE5C0600YJFM	CE5C0600YJFM	CE-5			Impact-Glass			Glass beads	na	IGGCE5-42-6@1				1.77	3.10893	167.03
Wang-et-al	2024	CE5C0600YJFM	CE5C0600YJFM	CE-5			Impact-Glass			Glass beads	na	IGGCE5-42-6@2				4.04	3.30474	108.52
Wang-et-al	2024	CE5C0600YJFM	CE5C0600YJFM	CE-5			Impact-Glass			Glass beads	na	IGGCE5-42-6@3				11.67	2.93195	146.17
Wang-et-al	2024	CE5C0600YJFM	CE5C0600YJFM	CE-5			Impact-Glass			Glass beads	na	IGGCE5-42-6@4				11.94	2.69852	113.7
Wang-et-al	2024	CE5C0600YJFM	CE5C0600YJFM	CE-5			Impact-Glass			Glass beads	na	IGGCE5-42-12@1				15	3.20855	61.43
Wang-et-al	2024	CE5C0600YJFM	CE5C0600YJFM	CE-5			Impact-Glass			Glass beads	na	IGGCE5-42-12@2				10.14	3.02788	79.78
Wang-et-al	2024	CE5C0600YJFM	CE5C0600YJFM	CE-5			Impact-Glass			Glass beads	na	IGGCE5-42-12@3				15.59	3.20583	46.02
Wang-et-al	2024	CE5C0600YJFM	CE5C0600YJFM	CE-5			Impact-Glass			Glass beads	na	IGGCE5-42-12@4				18.15	3.31122	46.09
Wang-et-al	2024	CE5C0600YJFM	CE5C0600YJFM	CE-5			Impact-Glass			Glass beads	na	IGGCE5-42-27@1				30.03	7.10795	14.42
Wang-et-al	2024	CE5C0600YJFM	CE5C0600YJFM	CE-5			Impact-Glass			Glass beads	na	IGGCE5-42-27@2				34.94	7.16283	8.38
Wang-et-al	2024	CE5C0600YJFM	CE5C0600YJFM	CE-5			Impact-Glass			Glass beads	na	IGGCE5-42-27@3				18.79	5.13053	23
Wang-et-al	2024	CE5C0600YJFM	CE5C0600YJFM	CE-5			Impact-Glass			Glass beads	na	IGGCE5-42-37@1				27.24	7.53628	6.31
Wang-et-al	2024	CE5C0600YJFM	CE5C0600YJFM	CE-5			Impact-Glass			Glass beads	na	IGGCE5-42-37@2				32.49	6.88748	6.95
Wang-et-al	2024	CE5C0600YJFM	CE5C0600YJFM	CE-5			Impact-Glass			Glass beads	na	IGGCE5-42-37@3				34.34	8.13794	5.85
Wang-et-al	2024	CE5C0600YJFM	CE5C0600YJFM	CE-5			Impact-Glass			Glass beads	na	IGGCE5-42-42@1				9.9	2.83678	117.11
Wang-et-al	2024	CE5C0600YJFM	CE5C0600YJFM	CE-5			Impact-Glass			Glass beads	na	IGGCE5-42-42@2				10.33	2.70732	102.09
Wang-et-al	2024	CE5C0600YJFM	CE5C0600YJFM	CE-5			Impact-Glass			Glass beads	na	IGGCE5-42-42@3				9.96	2.49629	161.32
Wang-et-al	2024	CE5C0600YJFM	CE5C0600YJFM	CE-5			Impact-Glass			Glass beads	na	IGGCE5-42-42@4				8.54	2.24916	294.16
Wang-et-al	2024	CE5C0600YJFM	CE5C0600YJFM	CE-5			Impact-Glass			Glass beads	na	IGGCE5-42-44@1				11.51	3.35382	53.07
Wang-et-al	2024	CE5C0600YJFM	CE5C0600YJFM	CE-5			Impact-Glass			Glass beads	na	IGGCE5-42-44@2				10.16	3.22967	48.18
Wang-et-al	2024	CE5C0600YJFM	CE5C0600YJFM	CE-5			Impact-Glass			Glass beads	na	IGGCE5-42-50@1				8.24	2.24916	768.76
Wang-et-al	2024	CE5C0600YJFM	CE5C0600YJFM	CE-5			Impact-Glass			Glass beads	na	IGGCE5-42-56@1				10.17	2.26055	115.33
Wang-et-al	2024	CE5C0600YJFM	CE5C0600YJFM	CE-5			Impact-Glass			Glass beads	na	IGGCE5-42-56@2				8	2.3371	824.05
Wang-et-al	2024	CE5C0600YJFM	CE5C0600YJFM	CE-5			Impact-Glass			Glass beads	na	IGGCE5-42-63@1				10.18	2.78955	91.96
Wang-et-al	2024	CE5C0600YJFM	CE5C0600YJFM	CE-5			Impact-Glass			Glass beads	na	IGGCE5-42-64@1				30.64	6.99235	9.31
Wang-et-al	2024	CE5C0600YJFM	CE5C0600YJFM	CE-5			Impact-Glass			Glass beads	na	IGGCE5-42-64@2				39.62	6.63241	8.97
Wang-et-al	2024	CE5C0600YJFM	CE5C0600YJFM	CE-5			Impact-Glass			Glass beads	na	IGGCE5-42-66@1				26.31	6.602	18.74
Wang-et-al	2024	CE5C0600YJFM	CE5C0600YJFM	CE-5			Impact-Glass			Glass beads	na	IGGCE5-42-66@2				48.83	8.63005	5.69
Wang-et-al	2024	CE5C0600YJFM	CE5C0600YJFM	CE-5			Impact-Glass			Glass beads	na	IGGCE5-42-79@1				11.54	2.58531	144.44
Wang-et-al	2024	CE5C0600YJFM	CE5C0600YJFM	CE-5			Impact-Glass			Glass beads	na	IGGCE5-42-79@2				13.67	2.56763	113.53
Wang-et-al	2024	CE5C0600YJFM	CE5C0600YJFM	CE-5			Impact-Glass			Glass beads	na	IGGCE5-42-79@3				12.92	2.7246	143.68
Wang-et-al	2024	CE5C0600YJFM	CE5C0600YJFM	CE-5			Impact-Glass			Glass beads	na	IGGCE5-42-86@1				12.01	3.13604	57.35
Wang-et-al	2024	CE5C0600YJFM	CE5C0600YJFM	CE-5			Impact-Glass			Glass beads	na	IGGCE5-42-86@2				11.86	4.79804	14.16
Wang-et-al	2024	CE5C0600YJFM	CE5C0600YJFM	CE-5			Impact-Glass			Glass beads	na	IGGCE5-42-87@1				12.23	2.43577	154.8
Wang-et-al	2024	CE5C0600YJFM	CE5C0600YJFM	CE-5			Impact-Glass			Glass beads	na	IGGCE5-42-90@1				31.19	7.6466	11.43
Wang-et-al	2024	CE5C0600YJFM	CE5C0600YJFM	CE-5			Impact-Glass			Glass beads	na	IGGCE5-42-90@2				44.14	9.18106	5.66
Wang-et-al	2024	CE5C0600YJFM	CE5C0600YJFM	CE-5			Impact-Glass			Glass beads	na	IGGCE5-42-101@1				14.16	6.91491	19.66
Wang-et-al	2024	CE5C0600YJFM	CE5C0600YJFM	CE-5			Impact-Glass			Glass beads	na	IGGCE5-42-101@2				45.96	7.23115	11.32
Wang-et-al	2024	CE5C0600YJFM	CE5C0600YJFM	CE-5			Impact-Glass			Glass beads	na	IGGCE5-42-101@3				30.08	5.81964	11.88
Wang-et-al	2024	CE5C0600YJFM	CE5C0600YJFM	CE-5			Impact-Glass			Glass beads	na	IGGCE5-42-101@4				52.65	9.12152	6.29
Wang-et-al	2024	CE5C0600YJFM	CE5C0600YJFM	CE-5			Impact-Glass			Glass beads	na	IGGCE5-42-121@1				13.35	4.39866	41.27
Wang-et-al	2024	CE5C0600YJFM	CE5C0600YJFM	CE-5			Impact-Glass			Glass beads	na	IGGCE5-46-8@1				8.11	2.67101	83.78
Wang-et-al	2024	CE5C0600YJFM	CE5C0600YJFM	CE-5			Impact-Glass			Glass beads	na	IGGCE5-46-8@2				8.58	2.95948	69.17
Wang-et-al	2024	CE5C0600YJFM	CE5C0600YJFM	CE-5			Impact-Glass			Glass beads	na	IGGCE5-46-8@3				7.71	2.61952	131.2
Wang-et-al	2024	CE5C0600YJFM	CE5C0600YJFM	CE-5			Impact-Glass			Glass beads	na	IGGCE5-46-8@4				8.48	2.52651	129.5
Wang-et-al	2024	CE5C0600YJFM	CE5C0600YJFM	CE-5			Impact-Glass			Glass beads	na	IGGCE5-46-8@5				9.1	2.39121	137.33
Wang-et-al	2024	CE5C0600YJFM	CE5C0600YJFM	CE-5			Impact-Glass			Glass beads	na	IGGCE5-46-18@1				11.01	3.49748	64.34
Wang-et-al	2024	CE5C0600YJFM	CE5C0600YJFM	CE-5			Impact-Glass			Glass beads	na	IGGCE5-46-18@2				10.87	2.82332	70.89
Wang-et-al	2024	CE5C0600YJFM	CE5C0600YJFM	CE-5			Impact-Glass			Glass beads	na	IGGCE5-46-30@1				12.63	2.96384	59.67
Wang-et-al	2024	CE5C0600YJFM	CE5C0600YJFM	CE-5			Impact-Glass			Glass beads	na	IGGCE5-46-30@2				13.49	3.63945	41.34
Wang-et-al	2024	CE5C0600YJFM	CE5C0600YJFM	CE-5			Impact-Glass			Glass beads	na	IGGCE5-46-64@1				22.57	6.1986	11.2
Wang-et-al	2024	CE5C0600YJFM	CE5C0600YJFM	CE-5			Impact-Glass			Glass beads	na	IGGCE5-46-76@1				8.69	2.92543	81.74
Wang-et-al	2024	CE5C0600YJFM	CE5C0600YJFM	CE-5			Impact-Glass			Glass beads	na	IGGCE5-46-77@1				10.68	3.27002	57.5
Wang-et-al	2024	CE5C0600YJFM	CE5C0600YJFM	CE-5			Impact-Glass			Glass beads	na	IGGCE5-46-77@2				10.03	3.10371	68.46
Wang-et-al	2024	CE5C0600YJFM	CE5C0600YJFM	CE-5			Impact-Glass			Glass beads	na	IGGCE5-46-88@1				6.81	2.70951	96.98
Wang-et-al	2024	CE5C0600YJFM	CE5C0600YJFM	CE-5			Impact-Glass			Glass beads	na	IGGCE5-42-68@1				7.67	2.24916	767.17
Wang-et-al	2024	CE5C0600YJFM	CE5C0600YJFM	CE-5			Impact-Glass			Glass beads	na	IGGCE5-42-68@2				9.6	2.24916	518.31
Wang-et-al	2024	CE5C0600YJFM	CE5C0600YJFM	CE-5			Impact-Glass			Glass beads	na	IGGCE5-42-69@1				30.87	9.54244	3.83
Wang-et-al	2024	CE5C0600YJFM	CE5C0600YJFM	CE-5			Impact-Glass			Glass beads	na	IGGCE5-42-69@2				57.93	7.87672	7.27
Wang-et-al	2024	CE5C0600YJFM	CE5C0600YJFM	CE-5			Impact-Glass			Glass beads	na	IGGCE5-42-97@1				12.94	5.15942	23.08
Wang-et-al	2024	CE5C0600YJFM	CE5C0600YJFM	CE-5			Impact-Glass			Glass beads	na	IGGCE5-42-97@2				15.53	4.0268	34.12
Wang-et-al	2024	CE5C0600YJFM	CE5C0600YJFM	CE-5			Impact-Glass			Glass beads	na	IGGCE5-42-117@1				26.11	3.33321	49.02
Wang-et-al	2024	CE5C0600YJFM	CE5C0600YJFM	CE-5			Impact-Glass			Glass beads	na	IGGCE5-46-72@1				5.08	3.3627	45.57
Wang-et-al	2024	CE5C0600YJFM	CE5C0600YJFM	CE-5			Impact-Glass			Glass beads	na	IGGCE5-46-98@1				9.34	3.00979	56.5
Wang-et-al	2024	CE5C0600YJFM	CE5C0600YJFM	CE-5			Impact-Glass			Glass beads	na	IGGCE5-46-107@1				25.92	6.00276	13.31
Wang-et-al	2024	CE5C0600YJFM	CE5C0600YJFM	CE-5			Impact-Glass			Glass beads	na	IGGCE5-50-17@1				5.05	2.51577	190.52
Wang-et-al	2024	CE5C0600YJFM	CE5C0600YJFM	CE-5			Impact-Glass			Glass beads	na	IGGCE5-50-22@1				12.1	2.97222	59.87
Wang-et-al	2024	CE5C0600YJFM	CE5C0600YJFM	CE-5			Impact-Glass			Glass beads	na	IGGCE5-43-344@1				9.69	0.972931	667.72
Wang-et-al	2024	CE5C0600YJFM	CE5C0600YJFM	CE-5			Impact-Glass			Glass beads	na	IGGCE5-45-46@1				5.67	1.14803	762.18
Wang-et-al	2024	CE5C0600YJFM	CE5C0600YJFM	CE-5			Impact-Glass			Glass beads	na	IGGCE5-38-7@1				5.11	1.0817	2318.06
Wang-et-al	2024	CE5C0600YJFM	CE5C0600YJFM	CE-5			Impact-Glass			Glass beads	na	IGGCE5-38-7@2				4.76	0.97386	2092.72
Wang-et-al	2024	CE5C0600YJFM	CE5C0600YJFM	CE-5			Impact-Glass			Glass beads	na	IGGCE5-38-7@3				7.35	0.855624	1981.94
Wang-et-al	2024	CE5C0600YJFM	CE5C0600YJFM	CE-5			Impact-Glass			Glass beads	na	IGGCE5-38-7@4				6.18	0.859899	2040.12
Wang-et-al	2024	CE5C0600YJFM	CE5C0600YJFM	CE-5			Impact-Glass			Glass beads	na	IGGCE5-38-19@1				2.24	1.94319	316.29
Wang-et-al	2024	CE5C0600YJFM	CE5C0600YJFM	CE-5			Impact-Glass			Glass beads	na	IGGCE5-38-19@2				3.41	1.55125	347.79
Wang-et-al	2024	CE5C0600YJFM	CE5C0600YJFM	CE-5			Impact-Glass			Glass beads	na	IGGCE5-43-20@1				3.97	0.757168	1307.02
Wang-et-al	2024	CE5C0600YJFM	CE5C0600YJFM	CE-5			Impact-Glass			Glass beads	na	IGGCE5-43-20@2				4.62	0.799014	1142.18
Wang-et-al	2024	CE5C0600YJFM	CE5C0600YJFM	CE-5			Impact-Glass			Glass beads	na	IGGCE5-43-35@1				9.14	0.806221	990.58
Wang-et-al	2024	CE5C0600YJFM	CE5C0600YJFM	CE-5			Impact-Glass			Glass beads	na	IGGCE5-43-35@2				9.36	0.76751	1176.83
Wang-et-al	2024	CE5C0600YJFM	CE5C0600YJFM	CE-5			Impact-Glass			Glass beads	na	IGGCE5-44-47@1				7.65	0.91504	790.84
Wang-et-al	2024	CE5C0600YJFM	CE5C0600YJFM	CE-5			Impact-Glass			Glass beads	na	IGGCE5-44-47@2				11.95	0.861411	903.78
Wang-et-al	2024	CE5C0600YJFM	CE5C0600YJFM	CE-5			Impact-Glass			Glass beads	na	IGGCE5-39-14@1				4.79	0.847301	1117.63
Wang-et-al	2024	CE5C0600YJFM	CE5C0600YJFM	CE-5			Impact-Glass			Glass beads	na	IGGCE5-43-58@1				8.61	1.35487	462.56
Wang-et-al	2024	CE5C0600YJFM	CE5C0600YJFM	CE-5			Impact-Glass			Glass beads	na	IGGCE5-43-85@1				5.73	1.063	648.37
Wang-et-al	2024	CE5C0600YJFM	CE5C0600YJFM	CE-5			Impact-Glass			Glass beads	na	IGGCE5-43-171@1				3.96	0.901528	798.34
Wang-et-al	2024	CE5C0600YJFM	CE5C0600YJFM	CE-5			Impact-Glass			Glass beads	na	IGGCE5-44-66@1				0.02	0.929858	1373.6
Wang-et-al	2024	CE5C0600YJFM	CE5C0600YJFM	CE-5			Impact-Glass			Glass beads	na	IGGCE5-45-42@1				6.98	0.7415	1749.74
Wang-et-al	2024	CE5C0600YJFM	CE5C0600YJFM	CE-5			Impact-Glass			Glass beads	na	IGGCE5-39-9@1				5.83	0.761204	1484.99
Wang-et-al	2024	CE5C0600YJFM	CE5C0600YJFM	CE-5			Impact-Glass			Glass beads	na	IGGCE5-39-27@1				3.09	1.19493	461.98
Wang-et-al	2024	CE5C0600YJFM	CE5C0600YJFM	CE-5			Impact-Glass			Glass beads	na	IGGCE5-39-41@1				2.61	1.02313	1714.87
Wang-et-al	2024	CE5C0600YJFM	CE5C0600YJFM	CE-5			Impact-Glass			Glass beads	na	IGGCE5-39-99@1				4.09	0.957464	880.82
Wang-et-al	2024	CE5C0600YJFM	CE5C0600YJFM	CE-5			Impact-Glass			Glass beads	na	IGGCE5-39-151@1				11.79	0.937797	1137.04
Wang-et-al	2024	CE5C0600YJFM	CE5C0600YJFM	CE-5			Impact-Glass			Glass beads	na	IGGCE5-39-185@1				8.95	1.03109	715.09
Wang-et-al	2024	CE5C0600YJFM	CE5C0600YJFM	CE-5			Impact-Glass			Glass beads	na	IGGCE5-39-195@1				3.22	1.77307	351.6
Wang-et-al	2024	CE5C0600YJFM	CE5C0600YJFM	CE-5			Impact-Glass			Glass beads	na	IGGCE5-39-196@1				9.27	0.848637	968.09
Wang-et-al	2024	CE5C0600YJFM	CE5C0600YJFM	CE-5			Impact-Glass			Glass beads	na	IGGCE5-39-200@1				6.78	1.23538	534.27
Wang-et-al	2024	CE5C0600YJFM	CE5C0600YJFM	CE-5			Impact-Glass			Glass beads	na	IGGCE5-39-214@1				5.59	1.00002	1061.92
Wang-et-al	2024	CE5C0600YJFM	CE5C0600YJFM	CE-5			Impact-Glass			Glass beads	na	IGGCE5-39-215@1				8.12	0.846693	1116.18
Wang-et-al	2024	CE5C0600YJFM	CE5C0600YJFM	CE-5			Impact-Glass			Glass beads	na	IGGCE5-39-231@1				0.65	0.89275	1584.05
Wang-et-al	2024	CE5C0600YJFM	CE5C0600YJFM	CE-5			Impact-Glass			Glass beads	na	IGGCE5-39-291@1				8.8	0.921368	870.2
Wang-et-al	2024	CE5C0600YJFM	CE5C0600YJFM	CE-5			Impact-Glass			Glass beads	na	IGGCE5-39-293@1				6.26	0.930081	1054.88
Wang-et-al	2024	CE5C0600YJFM	CE5C0600YJFM	CE-5			Impact-Glass			Glass beads	na	IGGCE5-39-311@1				2.58	0.988283	2344.89
Wang-et-al	2024	CE5C0600YJFM	CE5C0600YJFM	CE-5			Impact-Glass			Glass beads	na	IGGCE5-41-101@1				8.08	0.81914	1099.81
Wang-et-al	2024	CE5C0600YJFM	CE5C0600YJFM	CE-5			Impact-Glass			Glass beads	na	IGGCE5-41-104@1				7.9	0.747121	1876.35
Wang-et-al	2024	CE5C0600YJFM	CE5C0600YJFM	CE-5			Impact-Glass			Glass beads	na	IGGCE5-41-111@1				7.89	0.800943	1059.35
Wang-et-al	2024	CE5C0600YJFM	CE5C0600YJFM	CE-5			Impact-Glass			Glass beads	na	IGGCE5-41-117@1				12.28	1.47341	417.22
Wang-et-al	2024	CE5C0600YJFM	CE5C0600YJFM	CE-5			Impact-Glass			Glass beads	na	IGGCE5-41-137@1				12.43	1.1208	542.02
Wang-et-al	2024	CE5C0600YJFM	CE5C0600YJFM	CE-5			Impact-Glass			Glass beads	na	IGGCE5-41-143@1				9.24	0.887346	1022.08
Wang-et-al	2024	CE5C0600YJFM	CE5C0600YJFM	CE-5			Impact-Glass			Glass beads	na	IGGCE5-41-161@1				6.9	1.21868	564.32
Wang-et-al	2024	CE5C0600YJFM	CE5C0600YJFM	CE-5			Impact-Glass			Glass beads	na	IGGCE5-41-162@1				11.09	1.1248	622.71
Wang-et-al	2024	CE5C0600YJFM	CE5C0600YJFM	CE-5			Impact-Glass			Glass beads	na	IGGCE5-41-211@1				13.43	0.945038	856.56
Wang-et-al	2024	CE5C0600YJFM	CE5C0600YJFM	CE-5			Impact-Glass			Glass beads	na	IGGCE5-41-242@1				9.4	1.24199	556.92
Wang-et-al	2024	CE5C0600YJFM	CE5C0600YJFM	CE-5			Impact-Glass			Glass beads	na	IGGCE5-41-244@1				3.51	0.980331	836.11
Wang-et-al	2024	CE5C0600YJFM	CE5C0600YJFM	CE-5			Impact-Glass			Glass beads	na	IGGCE5-41-245@1				6.96	0.706786	2189.22
Wang-et-al	2024	CE5C0600YJFM	CE5C0600YJFM	CE-5			Impact-Glass			Glass beads	na	IGGCE5-41-256@1				9.9	1.4242	458.37
Wang-et-al	2024	CE5C0600YJFM	CE5C0600YJFM	CE-5			Impact-Glass			Glass beads	na	IGGCE5-41-278@1				3.44	0.893294	1260.5
Wang-et-al	2024	CE5C0600YJFM	CE5C0600YJFM	CE-5			Impact-Glass			Glass beads	na	IGGCE5-41-297@1				1.51	1.07028	663.39
Wang-et-al	2024	CE5C0600YJFM	CE5C0600YJFM	CE-5			Impact-Glass			Glass beads	na	IGGCE5-41-320@1				12.52	1.0264	759.32
Wang-et-al	2024	CE5C0600YJFM	CE5C0600YJFM	CE-5			Impact-Glass			Glass beads	na	IGGCE5-43-258@1				8.09	1.74335	319.26
Wang-et-al	2024	CE5C0600YJFM	CE5C0600YJFM	CE-5			Impact-Glass			Glass beads	na	IGGCE5-43-309@1				6.56	0.879457	1056.29
Wang-et-al	2024	CE5C0600YJFM	CE5C0600YJFM	CE-5			Impact-Glass			Glass beads	na	IGGCE5-43-328@1				2.61	1.25697	474.53
Wang-et-al	2024	CE5C0600YJFM	CE5C0600YJFM	CE-5			Impact-Glass			Glass beads	na	IGGCE5-45-114@1				8.13	0.76735	1259.33
Wang-et-al	2024	CE5C0600YJFM	CE5C0600YJFM	CE-5			Impact-Glass			Glass beads	na	IGGCE5-45-166@1				6.83	0.894082	762.2
Wang-et-al	2024	CE5C0600YJFM	CE5C0600YJFM	CE-5			Impact-Glass			Glass beads	na	IGGCE5-45-206@1				5.15	0.954256	781.55
Wang-et-al	2024	CE5C0600YJFM	CE5C0600YJFM	CE-5			Impact-Glass			Glass beads	na	IGGCE5-45-233@1				2.45	1.63206	440.88
Wang-et-al	2024	CE5C0600YJFM	CE5C0600YJFM	CE-5			Impact-Glass			Glass beads	na	IGGCE5-45-238@1				4.18	1.67144	370.51
Wang-et-al	2024	CE5C0600YJFM	CE5C0600YJFM	CE-5			Impact-Glass			Glass beads	na	IGGCE5-45-285@1				9.68	0.74697	1347.97
Kaplan & Smith	1970	10086	10086	Apollo-11	Fines	Fines	Fines	Fines	Fines	Fines	na	10086				5.4		680
Kaplan & Smith	1970	10086	10086	Apollo-11	Fines	Fines	Fines	Fines	Fines	Fines	na	10086				8.2		640
Kaplan & Smith	1970	10084	10084	Apollo-11	Fines	Fines	Fines	Fines	Fines	Fines	na	10084				4.7		770
Thode & Rees	1971	12002A	12002A	Apollo-12	Fines	Fines	Fines	Fines	Fines	Fines	na	12002A				0.46		633
Thode & Rees	1971	12070	12070-57	Apollo-12	Fines	Fines	Fines	Fines	Fines	Fines	na	12070-57				8.7		700
Kaplan & Petrowski	1971	12023	12023	Apollo-12	Fines	Fines	Fines	Fines	Fines	Fines	na	12023				8.3		620
Kaplan & Petrowski	1971	12023	12023	Apollo-12	Fines	Fines	Fines	Fines	Fines	Fines	na	12023				8.8		509
Kaplan & Petrowski	1971	12032	12032	Apollo-12	Fines	Fines	Fines	Fines	Fines	Fines	na	12032				4.9		714
Rees & Thode	1972	14163	14163132	Apollo-14	Fines	Fines	Fines	Fines	Fines	Fines	na	14163132				9.47		682
Rees & Thode	1972	14163	14163132	Apollo-14	Fines	Fines	Fines	Fines	Fines	Fines	na	14163132				9.76		788
Chang et al.	1974	15012	15012,16	Apollo-15	Fines	Fines	Fines	Fines	Fines	Fines	na	15012-16				5.3		654
Chang et al.	1974	15012	15012,16	Apollo-15	Fines	Fines	Fines	Fines	Fines	Fines	na	15012-16				7.6		950
Chang et al.	1974	15012	15012,16	Apollo-15	Fines	Fines	Fines	Fines	Fines	Fines	na	15012-16				10		556
Chang et al.	1974	15013	15013,3	Apollo-15	Fines	Fines	Fines	Fines	Fines	Fines	na	15013-3				9.1		697
Chang et al.	1974	15013	15013,3	Apollo-15	Fines	Fines	Fines	Fines	Fines	Fines	na	15013-3				8.4		687
Rees & Thode	1974	Ⅰ	Ⅰ	Apollo-16	Fines	Fines	Fines	Fines	Fines	Fines	na	Ⅰ				1.4		509
Rees & Thode	1974	Ⅱ	Ⅱ	Apollo-16	Fines	Fines	Fines	Fines	Fines	Fines	na	Ⅱ				1.9		742
Rees & Thode	1974	Ⅲ	Ⅲ	Apollo-16	Fines	Fines	Fines	Fines	Fines	Fines	na	Ⅲ				5.8		646
Rees & Thode	1974	68501	68501,47	Apollo-16	Fines	Fines	Fines	Fines	Fines	Fines	na	68501-47				8.6		581
Rees & Thode	1974	61501	61501,18	Apollo-16	Fines	Fines	Fines	Fines	Fines	Fines	na	61501-18				9.6		589
Rees & Thode	1974	64501	64501,21	Apollo-16	Fines	Fines	Fines	Fines	Fines	Fines	na	64501-21				9.7		500
Rees & Thode	1974	60601	60601,16	Apollo-16	Fines	Fines	Fines	Fines	Fines	Fines	na	60601-16				9.9		663
Rees & Thode	1974	71501	71501,42	Apollo-17	Fines	Fines	Fines	Fines	Fines	Fines	na	71501-42				5.3		996
Rees & Thode	1974	75081	75081,5	Apollo-17	Fines	Fines	Fines	Fines	Fines	Fines	na	75081-5				5.5		1014
Rees & Thode	1974	70011	70011,22	Apollo-17	Fines	Fines	Fines	Fines	Fines	Fines	na	70011-22				7.4		878
Rees & Thode	1974	76501	76501,47	Apollo-17	Fines	Fines	Fines	Fines	Fines	Fines	na	76501-47				8.9		620
Rees & Thode	1974	72501	72501,42	Apollo-17	Fines	Fines	Fines	Fines	Fines	Fines	na	72501-42				9.9		540
Rees & Thode	1974	72501	72501,42	Apollo-17	Fines	Fines	Fines	Fines	Fines	Fines	na	72501-42				5.3		580
Rees & Thode	1974	72501	72501,42	Apollo-17	Fines	Fines	Fines	Fines	Fines	Fines	na	72501-42				7.8		436
Rees & Thode	1974	72501	72501,42	Apollo-17	Fines	Fines	Fines	Fines	Fines	Fines	na	72501-42				8.9		580
Rees & Thode	1974	72501	72501,42	Apollo-17	Fines	Fines	Fines	Fines	Fines	Fines	na	72501-42				10.4		560
Rees & Thode	1974	72501	72501,42	Apollo-17	Fines	Fines	Fines	Fines	Fines	Fines	na	72501-42				12.9		693
Rees & Thode	1974	72501	72501,42	Apollo-17	Fines	Fines	Fines	Fines	Fines	Fines	na	72501-42				17.7		745
Rees & Thode	1974	75081	75081,5	Apollo-17	Fines	Fines	Fines	Fines	Fines	Fines	na	75081-5				2.1		1127
Rees & Thode	1974	75081	75081,5	Apollo-17	Fines	Fines	Fines	Fines	Fines	Fines	na	75081-5				2.3		970
Rees & Thode	1974	75081	75081,5	Apollo-17	Fines	Fines	Fines	Fines	Fines	Fines	na	75081-5				3.6		670
Rees & Thode	1974	75081	75081,5	Apollo-17	Fines	Fines	Fines	Fines	Fines	Fines	na	75081-5				4.3		765
Rees & Thode	1974	75081	75081,5	Apollo-17	Fines	Fines	Fines	Fines	Fines	Fines	na	75081-5				4.8		846
Rees & Thode	1974	75081	75081,5	Apollo-17	Fines	Fines	Fines	Fines	Fines	Fines	na	75081-5				5		840
Rees & Thode	1974	75081	75081,5	Apollo-17	Fines	Fines	Fines	Fines	Fines	Fines	na	75081-5				5.3		1029
Rees & Thode	1974	75081	75081,5	Apollo-17	Fines	Fines	Fines	Fines	Fines	Fines	na	75081-5				6		1543
Rees & Thode	1974	75081	75081,5	Apollo-17	Fines	Fines	Fines	Fines	Fines	Fines	na	75081-5				9.1		1717
Rees & Thode	1974	75081	75081,5	Apollo-17	Fines	Fines	Fines	Fines	Fines	Fines	na	75081-5				10.1		1717
Petrowsk et al.	1974	70011	70011,27	Apollo-17	Fines	Fines	Fines	Fines	Fines	Fines	na	70011-27				7.4		968
Petrowsk et al.	1974	71501	71501,22	Apollo-17	Fines	Fines	Fines	Fines	Fines	Fines	na	71501-22				6.4		1075
Petrowsk et al.	1974	72701	72701,15	Apollo-17	Fines	Fines	Fines	Fines	Fines	Fines	na	72701-15				10.1		617
Petrowsk et al.	1974	75061	75061,33	Apollo-17	Fines	Fines	Fines	Fines	Fines	Fines	na	75061-33				5.3		1151
Petrowsk et al.	1974	76501	76501,20	Apollo-17	Fines	Fines	Fines	Fines	Fines	Fines	na	76501-20				8		598
Petrowsk et al.	1974	78421	78421,28	Apollo-17	Fines	Fines	Fines	Fines	Fines	Fines	na	78421-28				11.7		804
Kerridge et al	1975a	60501	60501,20	Apollo-16	Fines	Fines	Fines	Fines	Fines	Fines	na	60501-20				9.4		673
Kerridge et al	1975a	62240	62240,6	Apollo-16	Fines	Fines	Fines	Fines	Fines	Fines	na	62240-6				9.8		592
Kerridge et al	1975a	63320	63320,10	Apollo-16	Fines	Fines	Fines	Fines	Fines	Fines	na	63320-10				8.4		481
Kerridge et al	1975a	63340	63340,10	Apollo-16	Fines	Fines	Fines	Fines	Fines	Fines	na	63340-10				7.9		539
Kerridge et al	1975a	63500	63500,6	Apollo-16	Fines	Fines	Fines	Fines	Fines	Fines	na	63500-6				8.1		478
Kerridge et al	1975a	65500	65500,7	Apollo-16	Fines	Fines	Fines	Fines	Fines	Fines	na	65500-7				7.1		829
Kerridge et al	1975a	66081	66081,12	Apollo-16	Fines	Fines	Fines	Fines	Fines	Fines	na	66081-12				10.4		749
Kerridge et al	1975a	67461	67461,21	Apollo-16	Fines	Fines	Fines	Fines	Fines	Fines	na	67461-21				6.3		365
Kerridge et al	1975a	67701	67701,31	Apollo-16	Fines	Fines	Fines	Fines	Fines	Fines	na	67701-31				7.1		381
Kerridge et al	1975a	68121	68121,11	Apollo-16	Fines	Fines	Fines	Fines	Fines	Fines	na	68121-11				8.1		704
Kerridge et al	1975a	68501	68501,32	Apollo-16	Fines	Fines	Fines	Fines	Fines	Fines	na	68501-32				8.5		681
Kerridge et al	1975a	69941	69941,37	Apollo-16	Fines	Fines	Fines	Fines	Fines	Fines	na	69941-37				10.9		792
Kerridge et al	1975a	69961	69961,34	Apollo-16	Fines	Fines	Fines	Fines	Fines	Fines	na	69961-34				10.3		761
Kaplan et al	1976	15012	15012,16	Apollo-15	Fines	Fines	Fines	Fines	Fines	Fines	na	15012-16				9.8		710
Kaplan et al	1976	15013	15013,3	Apollo-15	Fines	Fines	Fines	Fines	Fines	Fines	na	15013-3				9.2		710
Kaplan et al	1976	15231	15231,25	Apollo-15	Fines	Fines	Fines	Fines	Fines	Fines	na	15231-25				8		620
Kaplan et al	1976	15261	15261,25	Apollo-15	Fines	Fines	Fines	Fines	Fines	Fines	na	15261-25				10.8		710
Kaplan et al	1976	15271	15271,24	Apollo-15	Fines	Fines	Fines	Fines	Fines	Fines	na	15271-24				9.4		610
Kaplan et al	1976	15421	15421,4	Apollo-15	Fines	Fines	Fines	Fines	Fines	Fines	na	15421-4				8.3		400
Kaplan et al	1976	15431	15431,9	Apollo-15	Fines	Fines	Fines	Fines	Fines	Fines	na	15431-9				7.6		590
Kaplan et al	1976	15511	15511,7	Apollo-15	Fines	Fines	Fines	Fines	Fines	Fines	na	15511-7				8.8		660
Kaplan et al	1976	15600	15600,4	Apollo-15	Fines	Fines	Fines	Fines	Fines	Fines	na	15600-4				6.4		580
Rees & Thode	1972	15471	15471	Apollo-15	Soil	Soil	Soil	Soil	Soil	Bulk-Soil	na	15471				7.45		570
Rees & Thode	1972	15021	15021	Apollo-15	Soil	Soil	Soil	Soil	Soil	Bulk-Soil	na	15021				10.36		689
Kerridge et al	1975b	60051	60051,31	Apollo-16	Soil	Soil	Soil	Soil	Soil	Bulk-Soil	na	60051-31				11		520
Kerridge et al	1975b	61141	61141,33	Apollo-16	Soil	Soil	Soil	Soil	Soil	Bulk-Soil	na	61141-33				9.2		330
Kerridge et al	1975b	61161	61161,27	Apollo-16	Soil	Soil	Soil	Soil	Soil	Bulk-Soil	na	61161-27				12		570
Kerridge et al	1975b	61220	61220,29	Apollo-16	Soil	Soil	Soil	Soil	Soil	Bulk-Soil	na	61220-29				6.1		470
Kerridge et al	1975b	61281	61281,26	Apollo-16	Soil	Soil	Soil	Soil	Soil	Bulk-Soil	na	61281-26				9.9		480
Kerridge et al	1975b	62240	62240,6	Apollo-16	Soil	Soil	Soil	Soil	Soil	Bulk-Soil	na	62240-6				10.8		534
Kerridge et al	1975b	64421	64421,60	Apollo-16	Soil	Soil	Soil	Soil	Soil	Bulk-Soil	na	64421-60				13.5		650
Kerridge et al	1975b	64501	64501,63	Apollo-16	Soil	Soil	Soil	Soil	Soil	Bulk-Soil	na	64501-63				11.7		600
Kerridge et al	1975b	64801	64801,52	Apollo-16	Soil	Soil	Soil	Soil	Soil	Bulk-Soil	na	64801-52				13.3		660
Kerridge et al	1975b	64811	64811,2	Apollo-16	Soil	Soil	Soil	Soil	Soil	Bulk-Soil	na	64811-2				11.9		600
Kerridge et al	1975b	65701	65701,42	Apollo-16	Soil	Soil	Soil	Soil	Soil	Bulk-Soil	na	65701-42				13.2		790
Kerridge et al	1975b	65901	65901,66	Apollo-16	Soil	Soil	Soil	Soil	Soil	Bulk-Soil	na	65901-66				13		770
Kerridge et al	1975b	66041	66041,66	Apollo-16	Soil	Soil	Soil	Soil	Soil	Bulk-Soil	na	66041-66				12.3		810
Kerridge et al	1975b	67460	67460,3	Apollo-16	Soil	Soil	Soil	Soil	Soil	Bulk-Soil	na	67460-3				7.3		320
Kerridge et al	1975b	67480	67480,23	Apollo-16	Soil	Soil	Soil	Soil	Soil	Bulk-Soil	na	67480-23				8.3		330
Kerridge et al	1975b	67601	67601,5	Apollo-16	Soil	Soil	Soil	Soil	Soil	Bulk-Soil	na	67601-5				10		360
Kerridge et al	1975b	67941	67941,10	Apollo-16	Soil	Soil	Soil	Soil	Soil	Bulk-Soil	na	67941-10				6.6		420
Kerridge et al	1975b	68821	68821,45	Apollo-16	Soil	Soil	Soil	Soil	Soil	Bulk-Soil	na	68821-45				11.1		530
Kerridge et al	1975b	68841	68841,7	Apollo-16	Soil	Soil	Soil	Soil	Soil	Bulk-Soil	na	68841-7				11.1		750
Kaplan & Smith	1970	10002	10002-54	Apollo-11	Breccia	Breccia	Breccia	Breccia	Breccia	Bulk-Rock	na	10002-54				3.5		1070
Kaplan & Smith	1970	10060	10060-22	Apollo-11	Breccia	Breccia	Breccia	Breccia	Breccia	Bulk-Rock	na	10060-22				3.6		1120
Rees & Thode	1972	14321	14321-220	Apollo-14	Breccia	Breccia	Breccia	Breccia	Breccia	Bulk-Rock	na	14321-220				1.44		750
Rees & Thode	1972	14321	14321-220	Apollo-14	Breccia	Breccia	Breccia	Breccia	Breccia	Bulk-Rock	na	14321-220				0.9		1149
Rees & Thode	1974	68815	68815-101	Apollo-16	Breccia	Breccia	Breccia	Breccia	Breccia	Bulk-Rock	na	68815-101				0.4		500
Rees & Thode	1974	73235	73235-89	Apollo-17	Breccia	Breccia	Breccia	Breccia	Breccia	Bulk-Rock	na	73235-89				1.5		400
Rees & Thode	1974	79135	79135-36	Apollo-17	Breccia	Breccia	Breccia	Breccia	Breccia	Bulk-Rock	na	79135-36				9.4		828
Petrowski et al	1974	77035	77035-63	Apollo-17	Breccia	Breccia	Breccia	Breccia	Breccia	Bulk-Rock	na	77035-63				2.1		733
Petrowski et al	1974	77135	77135-75	Apollo-17	Breccia	Breccia	Breccia	Breccia	Breccia	Bulk-Rock	na	77135-75				1.7		634
Kerridge et al	1975a	61016	61016-159	Apollo-16	Breccia	Breccia	Breccia	Breccia	Breccia	Bulk-Rock	na	61016-159				1.9		534
Kerridge et al	1975a	61016	61016-159	Apollo-16	Breccia	Breccia	Breccia	Breccia	Breccia	Bulk-Rock	na	61016-159				1.3		589
Kerridge et al	1975a	65015	65015-64	Apollo-16	Breccia	Breccia	Breccia	Breccia	Breccia	Bulk-Rock	na	65015-64				1.3		903
Kerridge et al	1975a	66095	66095-43	Apollo-16	Breccia	Breccia	Breccia	Breccia	Breccia	Bulk-Rock	na	66095-43				1.8		1032
Kaplan et al	1976	152659	152659-004	Apollo-15	Breccia	Breccia	Breccia	Breccia	Breccia	Bulk-Rock	na	152659004				6.4		830
Kaplan et al	1976	15498	15498-31	Apollo-15	Breccia	Breccia	Breccia	Breccia	Breccia	Bulk-Rock	na	15498-31				5.1		680
Marais, 1983	1983	64435	64435-28	Apollo-16	Breccia	Breccia	Breccia	Breccia	Breccia	Bulk-Rock	na	64435-28				-0.2		693
Marais, 1983	1983	65015	65015-174	Apollo-16	Breccia	Breccia	Breccia	Breccia	Breccia	Bulk-Rock	na	65015-174				0.5		973
Kaplan & Smith	1970	10049	10049	Apollo-11	Low-K-Basalt	Low-K-Basalt	Low-K-Basalt	to-check	to-check	Bulk-Rock	na	10049				1.2		2200
Thode & Rees	1971	12053	12053-71	Apollo-12	Ol-Mare-Basalt	Ol-Mare-Basalt	Ol-Mare-Basalt	to-check	to-check	Bulk-Rock	na	12053-71				0.68		730
Thode & Rees	1971	12021	12021-60	Apollo-12	Ol-Mare-Basalt	Ol-Mare-Basalt	Ol-Mare-Basalt	to-check	to-check	Bulk-Rock	na	12021-60				0.38		895
Thode & Rees	1971	12022	12022-50	Apollo-12	Ol-Mare-Basalt	Ol-Mare-Basalt	Ol-Mare-Basalt	to-check	to-check	Bulk-Rock	na	12022-50				0.37		903
Thode & Rees	1971	12018	12018-33	Apollo-12	Ol-Mare-Basalt	Ol-Mare-Basalt	Ol-Mare-Basalt	to-check	to-check	Bulk-Rock	na	12018-33				0.68		550
Kaplan & Petrowski	1971	12022	12022-77	Apollo-12	Ol-Mare-Basalt	Ol-Mare-Basalt	Ol-Mare-Basalt	to-check	to-check	Bulk-Rock	na	12022-77				-0.2		754
Kaplan & Petrowski	1971	12022	12022-71	Apollo-12	Ol-Mare-Basalt	Ol-Mare-Basalt	Ol-Mare-Basalt	to-check	to-check	Bulk-Rock	na	12022-71				-0.1		805
Rees & Thode	1972	12021	12021-60	Apollo-12	Ol-Mare-Basalt	Ol-Mare-Basalt	Ol-Mare-Basalt	to-check	to-check	Bulk-Rock	na	12021-60				0.56		768
Rees & Thode	1972	12021	12021-60	Apollo-12	Ol-Mare-Basalt	Ol-Mare-Basalt	Ol-Mare-Basalt	to-check	to-check	Bulk-Rock	na	12021-60				0.65		683
Rees & Thode	1972	12053	12053-71	Apollo-12	Ol-Mare-Basalt	Ol-Mare-Basalt	Ol-Mare-Basalt	to-check	to-check	Bulk-Rock	na	12053-71				0.47		745
Rees & Thode	1972	15495	15495-60	Apollo-15	Regolith-Breccia	Regolith-Breccia	Regolith-Breccia	to-check	to-check	Bulk-Rock	na	15495-60				0.24		569
Rees & Thode	1972	15557	15557-47	Apollo-15	Mare Basalt	Mare Basalt	Mare Basalt	to-check	to-check	Bulk-Rock	na	15557-47				0.29		673
Rees & Thode	1972	15076	15076-23	Apollo-15	Ol-Mare-Basalt	Ol-Mare-Basalt	Ol-Mare-Basalt	to-check	to-check	Bulk-Rock	na	15076-23				0.57		499
Rees & Thode	1972	61016	61016-137	Apollo-16	Feldspathic-Polymict-breccia	Feldspathic-Polymict-breccia	Feldspathic-Polymict-breccia	to-check	to-check	Bulk-Rock	na	61016-137				-0.1		518
Rees & Thode	1972	70215	70215-80	Apollo-17	Impact-Melt-Breccia	Impact-Melt-Breccia	Impact-Melt-Breccia	to-check	to-check	Bulk-Rock	na	70215-80				0.6		1581
Rees & Thode	1972	74275	74275-62	Apollo-17	Hi-Ti-Basalt	Hi-Ti-Basalt	Hi-Ti-Basalt	to-check	to-check	Bulk-Rock	na	74275-62				0.6		1223
Petrowski et al	1974	70017	70017-64	Apollo-17	Regolith-Breccia	Regolith-Breccia	Regolith-Breccia	to-check	to-check	Bulk-Rock	na	70017-64				1.4		2283
Petrowski et al	1974	70215	70215-52	Apollo-17	Impact-Melt-Breccia	Impact-Melt-Breccia	Impact-Melt-Breccia	to-check	to-check	Bulk-Rock	na	70215-52				1.5		1689
Petrowski et al	1974	74275	74275-54	Apollo-17	Hi-Ti-Basalt	Hi-Ti-Basalt	Hi-Ti-Basalt	to-check	to-check	Bulk-Rock	na	74275-54				2		1397
Petrowski et al	1974	75035	75035-41	Apollo-17	Hi-Ti-Basalt	Hi-Ti-Basalt	Hi-Ti-Basalt	to-check	to-check	Bulk-Rock	na	75035-41				1.7		1849
Petrowski et al	1974	75075	75075-55	Apollo-17	Hi-Ti-Basalt	Hi-Ti-Basalt	Hi-Ti-Basalt	to-check	to-check	Bulk-Rock	na	75075-55				1.8		1708
Kerridge et al	1975b	10057	10057-40	Apollo-11	Low-K-Basalt	Low-K-Basalt	Low-K-Basalt	to-check	to-check	Bulk-Rock	na	10057-40				1.2		2280
Gibson	1975	15016	15016	Apollo-15	Quartz-Norm-Basalt	Quartz-Norm-Basalt	Quartz-Norm-Basalt	to-check	to-check	Bulk-Rock	na	15016				-1.6		664
Gibson	1975	15058	15058-72	Apollo-15	Quartz-Norm-Basalt	Quartz-Norm-Basalt	Quartz-Norm-Basalt	to-check	to-check	Bulk-Rock	na	15058-72				-0.5		683
Gibson	1975	15058	15058-95	Apollo-15	Quartz-Norm-Basalt	Quartz-Norm-Basalt	Quartz-Norm-Basalt	to-check	to-check	Bulk-Rock	na	15058-95				-0.6		468
Gibson	1975	15065	15065	Apollo-15	Quartz-Norm-Basalt	Quartz-Norm-Basalt	Quartz-Norm-Basalt	to-check	to-check	Bulk-Rock	na	15065				-0.9		396
Gibson	1975	15076	15076	Apollo-15	Quartz-Norm-Basalt	Quartz-Norm-Basalt	Quartz-Norm-Basalt	to-check	to-check	Bulk-Rock	na	15076				-1.2		651
Gibson	1975	15085	15085	Apollo-15	Quartz-Norm-Basalt	Quartz-Norm-Basalt	Quartz-Norm-Basalt	to-check	to-check	Bulk-Rock	na	15085				-1.3		559
Gibson	1975	15499	15499-20	Apollo-15	Regolith-Breccia	Regolith-Breccia	Regolith-Breccia	to-check	to-check	Bulk-Rock	na	15499-20				0.2		650
Gibson	1975	15499	15499-22	Apollo-15	Regolith-Breccia	Regolith-Breccia	Regolith-Breccia	to-check	to-check	Bulk-Rock	na	15499-22				-0.9		656
Gibson	1975	15555	15555	Apollo-15	Basalt	Basalt	Basalt	to-check	to-check	Bulk-Rock	na	15555				-0.3		726
Gibson	1975	15556	15556	Apollo-15	Basalt	Basalt	Basalt	to-check	to-check	Bulk-Rock	na	15556				0.9		749
Gibson	1975	70035	70035	Apollo-17	Regolith-Breccia	Regolith-Breccia	Regolith-Breccia	to-check	to-check	Bulk-Rock	na	70035				-0.2		1240
Gibson	1975	70215	70215	Apollo-17	Impact-Melt-Breccia	Impact-Melt-Breccia	Impact-Melt-Breccia	to-check	to-check	Bulk-Rock	na	70215				0		1641
Gibson	1975	74275	74275	Apollo-17	Hi-Ti-Basalt	Hi-Ti-Basalt	Hi-Ti-Basalt	to-check	to-check	Bulk-Rock	na	74275				-0.1		1246
Gibson	1975	75035	75035	Apollo-17	Hi-Ti-Basalt	Hi-Ti-Basalt	Hi-Ti-Basalt	to-check	to-check	Bulk-Rock	na	75035				0.6		1877
Gibson	1975	75055	75055	Apollo-17	Hi-Ti-Basalt	Hi-Ti-Basalt	Hi-Ti-Basalt	to-check	to-check	Bulk-Rock	na	75055				-0.2		1696
Kaplan et al	1976	15016	15016-44	Apollo-15	Quartz-Norm-Basalt	Quartz-Norm-Basalt	Quartz-Norm-Basalt	to-check	to-check	Bulk-Rock	na	15016-44				0.8		680
Kaplan et al	1976	15499	15499-11	Apollo-15	Basalt	Basalt	Basalt	to-check	to-check	Bulk-Rock	na	15499-11				0.6		570
Kaplan et al	1976	15555	15555-135	Apollo-15	Basalt	Basalt	Basalt	to-check	to-check	Bulk-Rock	na	15555-135				0.8		580
Marais-et-al	1983	15016	15016-52	Apollo-15	Quartz-Norm-Basalt	Quartz-Norm-Basalt	Quartz-Norm-Basalt	to-check	to-check	Bulk-Rock	na	15016-52				1		719
Marais-et-al	1983	15499	15499-69	Apollo-15	Regolith-Breccia	Regolith-Breccia	Regolith-Breccia	to-check	to-check	Bulk-Rock	na	15499-69				0.7		799
Marais-et-al	1983	66095	66095-198	Apollo-16-	Feldspathic-Polymict-breccia	Feldspathic-Polymict-breccia	Feldspathic-Polymict-breccia	to-check	to-check	Bulk-Rock	na	66095-198				0.6		1165
Marais-et-al	1983	70017	70017-435	Apollo-17	Regolith-Breccia	Regolith-Breccia	Regolith-Breccia	to-check	to-check	Bulk-Rock	na	70017-435				0.6		1455
Marais-et-al	1983	70017	70017-435	Apollo-17	Regolith-Breccia	Regolith-Breccia	Regolith-Breccia	to-check	to-check	Bulk-Rock	na	70017-435				0.8		1397
Marais-et-al	1983	74275	74275-147	Apollo-17	Hi-Ti-Basalt	Hi-Ti-Basalt	Hi-Ti-Basalt	to-check	to-check	Bulk-Rock	na	74275-147				0.9		1445
Marais-et-al	1983	74275	74275-147	Apollo-17	Hi-Ti-Basalt	Hi-Ti-Basalt	Hi-Ti-Basalt	to-check	to-check	Bulk-Rock	na	74275-147				1		1281
Wing-&-Farquhar	2015	10049	10049-97	Apollo-11	Low-K-Basalt	Low-K-Basalt	Low-K-Basalt	to-check	to-check	Bulk-Rock	na	10049-97				0.685		2131
Wing-&-Farquhar	2015	10057	10057-271	Apollo-11	Low-K-Basalt	Low-K-Basalt	Low-K-Basalt	to-check	to-check	Bulk-Rock	na	10057-271				0.686		2074
Wing-&-Farquhar	2015	12018	12018-248	Apollo-12	Quartz-Norm-Basalt	Quartz-Norm-Basalt	Quartz-Norm-Basalt	to-check	to-check	Bulk-Rock	na	12018-248				0.576		546
Wing-&-Farquhar	2015	12021	12021-592	Apollo-12	Quartz-Norm-Basalt	Quartz-Norm-Basalt	Quartz-Norm-Basalt	to-check	to-check	Bulk-Rock	na	12021-592				0.443		626
Wing-&-Farquhar	2015	12022	12022-281	Apollo-12	Quartz-Norm-Basalt	Quartz-Norm-Basalt	Quartz-Norm-Basalt	to-check	to-check	Bulk-Rock	na	12022-281				0.446		1028
Wing-&-Farquhar	2015	70017	70017-518	Apollo-17	Regolith-Breccia	Regolith-Breccia	Regolith-Breccia	to-check	to-check	Bulk-Rock	na	70017-518				0.532		1254
Wing-&-Farquhar	2015	70215	70215-321	Apollo-17	Impact-Melt-Breccia	Impact-Melt-Breccia	Impact-Melt-Breccia	to-check	to-check	Bulk-Rock	na	70215-321				0.654		1721
Wing-&-Farquhar	2015	70275	70275-207	Apollo-17	Impact-Melt-Breccia	Impact-Melt-Breccia	Impact-Melt-Breccia	to-check	to-check	Bulk-Rock	na	70275-207				0.515		1174
Wing-&-Farquhar	2015	75035	75035-219	Apollo-17	Hi-Ti-Basalt	Hi-Ti-Basalt	Hi-Ti-Basalt	to-check	to-check	Bulk-Rock	na	75035-219				0.471		1556
Wing-&-Farquhar	2015	75075	75075-16	Apollo-17	Hi-Ti-Basalt	Hi-Ti-Basalt	Hi-Ti-Basalt	to-check	to-check	Bulk-Rock	na	75075-16				0.594		1374
[truncated: 17 more columns]

## Sheet: Supplementary Table 4 -Troilite
	Supplementary Table 4. Analysed troilite grains petrography
		Troilite			Apatite													Bulk Gargano et al	Gibson	Kaplan	Des Marias
	Sample I.D.	Analysis I.D.	δ34S(V-CDT) (‰)	2σ (‰)	Apatite location	Apatite I.D.	δ34S(V-CDT) (‰)	2σ (‰)	S (ppm)	2σ (ppm	δ37Cl (SMOC) (‰)	2σ (‰)	Cl (ppm)	2σ (ppm)
	15556	Tr003_1	-0.476067	0.821566	w/apatite	ap003	6.4	1.2	1473	167	29.5	1.9	2365	114				0.57	0.9
		Tr003_2	-0.507072	0.826692	w/apatite	ap003	6.4	1.2	1473	167	29.5	1.9	2365	114				0.57	0.9
		Tr002	1.19601	0.834464	w/apatite	ap001	2.7	1.2	2806	317	14.6	2.2	853	41				0.57	0.9
		Tr001	0.888175	0.844982	w/apatite	Ap001	2.7	1.2	2806	317	14.6	2.2	853	41				0.57	0.9
	12039	Tr004_1	0.728718	0.811455	na ?
		Tr004_2	-0.460564	0.805232	na ?
		Tr004_3	0.36994	0.816487	na ?
		Tr004_4	1.02991	0.822843	na ?
		Tr003	1.02327	0.833162	na ?
	15475 17	Tr005_1	-0.180129	0.942635	w/apatite close to hole?	ap005a	-7.8	2.4	71	8	14.4	1.2	1718	83
		Tr005_2	0.778837	0.944746	w/apatite	ap005a	-7.8	2.4	71	8	14.4	1.2	1718	83
		Tr004_1	0.383707	0.944746	w/apatite	ap004b	2.6	2.5	115	13	15.2	1.6	1979	96
		Tr004_2	0.716682	0.947935	w/apatite	ap004b	2.6	2.5	115	13	15.2	1.6	1979	96
		Tr004_3	0.403686	0.951151	w/apatite	ap004b	2.6	2.5	115	13	15.2	1.6	1979	96
	15016	TR006_1	0.800202	1.19021	large including ap	ap6	36.4	3.2	2797	653	12.5	2.9	350	24				0.8	-1.6	0.8	1
		TR006_2	0.145757	1.18853	large including ap	ap6	36.4	3.2	2797	653	12.5	2.9	350	24				0.8	-1.6	0.8	1
		TR006_3	0.47298	1.18522	large including ap	ap6	36.4	3.2	2797	653	12.5	2.9	350	24				0.8	-1.6	0.8	1
		Tr005	0.702258	1.19189	w/apatite	ap5	32.9	5.9	181	42	6.5	0.9	2629	183				0.8	-1.6	0.8	1
	15065	Tr002b	-0.156979	1.1877	na ?		-20				10								-0.9
		Tr003a2_1	-0.0901991	1.18853	na ?		-20				10								-0.9
		Tr003a2_2	0.757908	1.19274	na ?		-20				10								-0.9
		Tr004	0.272639	1.19359	w/apatite	ap004	-22	4.4	72	12	8.2	1.6	802	30					-0.9

## Sheet: Supplementary Table 5 - S spec
	Supplementary Table 5. S-XANES results for lunar materials from the January and May 2019 analytical sessions.
		Scan no.	Sample	Grain	S6+	S4+	S2- Broad	S2- Sharp		S6+/ΣStot
					2483 eV	2478.9 eV	~2477 eV	2471 eV
	January 2019	135499	15016	Ap42	6.77	0	2.51	0.69		0.68
		135500	15016	Ap42	4.7	0	4.22	0.87		0.48
		135502	15016	Ap42	4.4	0	4.63	1.19		0.43
		135504	15016	Ap42	4.68	0	3.07	1.28		0.52
		135505	15016	Ap42	5.68	0	0.51	3.41		0.59
		135506	15016	Ap42	4.66	0	4.97	0.82		0.45
		135508	15016	Ap42	7.93	0	5.95	0.22		0.56
		135509	15016	Ap42	4.48	0	2.93	1.28		0.52
		135510	15016	Ap42	3.13	0	5.61	1.21		0.31
		135512	15016	Ap42	5.94	0	3.14	0		0.65
		135513	15016	Ap42	3.24	0	4.52	1.29		0.36
		135515	15016	Ap42	6.45	0	3.36	0		0.66
		135516	15016	Ap42	3.92	0	4.15	0.81		0.44
		135518	15016	Ap42	6.94	0	4.13	0.21		0.62
		135519	15016	Ap42	6.68	0	0.63	1.13		0.79
		135520	15016	Ap42	5.47	0	4.36	0		0.56
		135521	15016	Ap42	6.81	0	4.49	0		0.6
		135522	15016	Ap42	6.55	0	1.87	0		0.78
		135523	15016	Ap42	5.24	0	2.82	1.47		0.55
		135524	15016	Ap42	4.34	0	4.68	1.22		0.42
		135525	15016	Ap42	6.68	0	1.83	1.13		0.69
		135526	15016	Ap42	5.26	0	2.77	1.21		0.57
		135527	15016	Ap42	4.62	0	4.45	1.3		0.45
		135634	15065	Ap007	3.3	0	4.83	1.68		0.34
		135635	15065	Ap007	3.04	0	6.89	0.83		0.28
		135636	15065	Ap007	3.78	0	5.87	1.01		0.35
		136022	15065	Ap007	4.3	0	7.68	1.47		0.32
		136023	15065	Ap007	3.29	0	7.9	1.55		0.26
		136024	15065	Ap007	2.68	0	6.86	1.78		0.24
		136025	15065	Ap007	5.37	0	8.79	1.45		0.34
		136027	15065	Ap007	0.72	0	5.4	2.16		0.09
		136028	15065	Ap007	1.33	0	4.85	1.87		0.16
		136029	15065	Ap007	3.96	0	7.76	1.86		0.29
		136030	15065	Ap007	5.17	0	11	1.36		0.3
		136031	15065	Ap007	5.26	0	11.46	1.16		0.29
		135558	15065	Ap005b	3.45	0	7.4	0		0.32
		135573	15065	Ap005b	2.63	0	1.28	6.42		0.25
		135576	15065	Ap005b	2.97	0	3.15	3.57		0.31
		135578	15065	Ap005b	2.91	0	5	1.27		0.32
		135583	15065	Ap005b	2.44	0	6.59	0.76		0.25
		135586	15065	Ap005b	2.25	0	1.21	6.13		0.23
		135588	15065	Ap005b	2.82	0	6.11	0.72		0.29
		135589	15065	Ap005b	2.63	0	5.75	1.33		0.27
		135590	15065	Ap005b	2.87	0	5.88	0.77		0.3
		135977	15065	Ap005b	5.19	0	11.47	0.92		0.3
		135978	15065	Ap005b	7.05	0	12.91	0.83		0.34
		135980	15065	Ap005b	6.17	0	13.09	1.01		0.3
		135981	15065	Ap005b	4.39	0	6.78	1.56		0.34
		135640	15065	Ap001b	4.84	0	1.52	4.44		0.45
		135641	15065	Ap001b	4.51	0	6.25	0.11		0.41
		135643	15065	Ap001b	4.87	0	3.28	2.1		0.47
		135644	15065	Ap001b	3.94	0	4.71	0.77		0.42
		135645	15065	Ap001b	2.39	0	6.22	1.26		0.24
		135646	15065	Ap001b	2.8	0	6.38	1.22		0.27
		136007	15065	Ap001b	0.85	0	6.16	2.78		0.09
		136008	15065	Ap001b	1.32	0	7.64	2.83		0.11
		136009	15065	Ap001b	0.68	0	6.36	2.51		0.07
		136010	15065	Ap001b	0.41	0	3.17	2.47		0.07
		136019	15065	Ap001b	0.73	0	4.27	2.28		0.1
		135594	15065	Ap003	3.34	0	4.87	1.51		0.34
		135596	15065	Ap003	3.32	0	3.14	3.2		0.34
		135600	15065	Ap003	3.46	0	5.24	0.96		0.36
		135604	15065	Ap003	3.28	0	5.04	0.85		0.36
		135608	15065	Ap003	3.41	0	5.41	0.79		0.35
		135612	15065	Ap003	3.61	0	5.29	0.51		0.38
		135616	15065	Ap003	3.95	0	3.85	2.09		0.4
		135620	15065	Ap003	3.36	0	5.07	0.77		0.37
		135624	15065	Ap003	3.49	0	4.65	1		0.38
		135626	15065	Ap003	2.75	0	5.58	1.02		0.29
		135664	15058	Ap012a	3.64	0	6.32	0		0.37
		135666	15058	Ap012a	3	0	8.08	0		0.27
		135667	15058	Ap012a	2.99	0	6.72	0		0.31
		135668	15058	Ap012a	2.85	0	6.84	0		0.29
		135670	15058	Ap012a	3.02	0	6.79	0		0.31
		135671	15058	Ap012a	2.9	0	7.52	0.84		0.26
		135672	15058	Ap012a	2.56	0	6.54	1.09		0.25
		135674	15058	Ap012a	4.12	0	6.87	0.5		0.36
		135676	15058	Ap012a	3.86	0	3.89	1.79		0.4
		135677	15058	Ap012a	2.82	0	7.46	0		0.27
		135678	15058	Ap012a	3.02	0	5.53	1.38		0.3
		135680	15058	Ap012a	4.6	0	6.33	0.75		0.39
		135682	15058	Ap012a	4.96	0	6.36	0.25		0.43
		135686	15058	Ap016	2.42	0	6.68	0		0.27
		135687	15058	Ap016	4.15	0	6.42	0		0.39
		135688	15058	Ap016	4.49	0	9.1	0		0.33
		135692	15058	Ap016	2.22	0	8.55	0		0.21
		135928	12039	Ap001_a	1.57	0	5.05	1.91		0.18
		135929	12039	Ap001_a	2.33	0	6.67	1.05		0.23
		135931	12039	Ap001_a	2.41	0	4.26	1.66		0.29
		135932	12039	Ap001_a	1.97	0	5.58	1.74		0.21
		135945	12039	Ap001_f	3.84	0	5.1	1.99		0.35
		135946	12039	Ap001_f	4.31	0	4.06	1.95		0.42
		135947	12039	Ap001_f	4.32	0	4.63	1.84		0.4
		135788	SaU 169	SOI 7	6.25	0	0.29	0.75		0.86
		135789	SaU 169	SOI 7	4.72	0.78	0	0		0.86
		135791	SaU 169	SOI 7	10.5	0	0	1.85		0.85
		135829	SaU 169	SOI 14	7.28	0	0	0		1
		135832	SaU 169	SOI 14	7.87	0	0	0		1
		135835	SaU 169	SOI 14	10.44	0	0	0		1
		135838	SaU 169	SOI 14	11.45	0	0	0		1
		135841	SaU 169	SOI 14	12.07	0	0	0		1
		135850	SaU 169	SOI 15	12.24	0	0	0		1
		135851	SaU 169	SOI 15	11.31	0	0	0		1
		135852	SaU 169	SOI 15	12.06	0	0	0		1
		135853	SaU 169	SOI 15	10.98	0	0	0		1
		135854	SaU 169	SOI 15	9.13	0	0	0		1
		135770	Symp glass	15058	0.9	0	7.17	2.08		0.09
		135771	Symp glass	15058	1.35	0	6.79	2.03		0.13
		135772	Symp glass	15058	1.26	0	6.74	2.04		0.13
		135756	Epoxy	15058	b.d.	b.d.	b.d.	b.d.		-
		135758	Epoxy	15058	b.d.	b.d.	b.d.	b.d.		-
		135741	Pyroxene	15058	0.8	0	7.11	2.29		0.08
		135742	Pyroxene	15058	0.29	0	7.23	2.21		0.03
		135743	Pyroxene	15058	1.2	0	6.75	2.42		0.12
		135744	Pyroxene	15058	0	0	8.57	1.91		0
		135745	Pyroxene	15058	0.58	0	7.15	1.93		0.06
		135746	Pyroxene	15058	1	0	6.53	1.89		0.11
		135687	Durango	Single crystal	11.93	0.53	0	0		0.96
		135871	Durango	Single crystal	11.23	0.44	0	0		0.96
		135873	Durango	Single crystal	12.11	0.58	0	0		0.95
		135874	Durango	Single crystal	11.42	0.75	0	0		0.94
		135878	Durango	Single crystal	12.42	0.78	0	0		0.94
	May 2019	145295	15065	Ap007	1.69	0	6.11	2.18		0.17
		145296	15065	Ap007	1.93	0	6.51	2.26		0.18
		145297	15065	Ap007	2.35	0	5.87	2.35		0.22
		145298	15065	Ap007	2.23	0	7.25	2.16		0.19
		145491	15475127	Ap002	0.74	0	7.53	2.06		0.07
		145492	15475127	Ap002	0.44	0	7.5	2.21		0.04
		145493	15475127	Ap002	0.6	0	7.73	2.21		0.06
		145494	15475127	Ap002	0.41	0	7.38	2.21		0.04
		145495	15475127	Ap002	0.56	0	7.46	2.17		0.05
		145480	15475127	Ap003a	1.9	0	12.47	1.33		0.12
		145485	15475127	Ap003b	0.68	0	9.74	1.61		0.06
		145486	15475127	Ap003b	1.22	0	10.85	1.66		0.09
		145487	15475127	Ap003b	1.25	0	9.85	1.69		0.1
		145488	15475127	Ap003b	1.59	0	10.19	1.66		0.12

## Sheet: Supplementary Table 6 - La Sm
	Supplementary Table 6. Bulk-rock La and Sm abundances
	Sample I.D.	La (ppm)	Sm (ppm)	References
	12031	5.01	3.62	Nyquist et al. (1977)
	12039	7.25	5.1	Nyquist et al. (1977)
	14053	14.6 ± 0.2	7.47 ± 0.13	Hallis et al. (2014)
	15016	4.77 ± 0.07	3.27 ± 0.06	Hallis et al. (2014)
	15058	6	4.1	Fruchter et al. (1973)
	15065	5.1	3.4	Fruchter et al. (1973)
	15085	6.5	4.5	Fruchter et al. (1973)
	15386	78.3 ± 1.2	34.1 ± 0.6	Hallis et al. (2014)
	15475,17	5.76	3.66	Rhodes and Hubbard (1973)
	15475127	5.76	3.66	Rhodes and Hubbard (1973)
	15555	1.79 ± 0.03	1.34 ± 0.02	Hallis et al. (2014)
	15556	5.79	3.6	Neal (2001)
	67915	26.7	13.1	Taylor et al. (1980)
	79215	3.23 ± 0.21*	1.46 ± 0.19*	Hudgins et al. (2008)
	* Indicates averages and standard deviations of multiple analyses, all other uncertainties represent the respective analytical uncertainties where available.
